# Supplementary material
Source: PubMed Central journal article supplement (PMC4944414)
Supplement: supp_tpc.16.00197_TPC2016-00197-RAR1_Supplemental_Data_pdfREV.pdf [file supp_tpc.16.00197_TPC2016-00197-RAR1_Supplemental_Data_pdfREV.pdf]

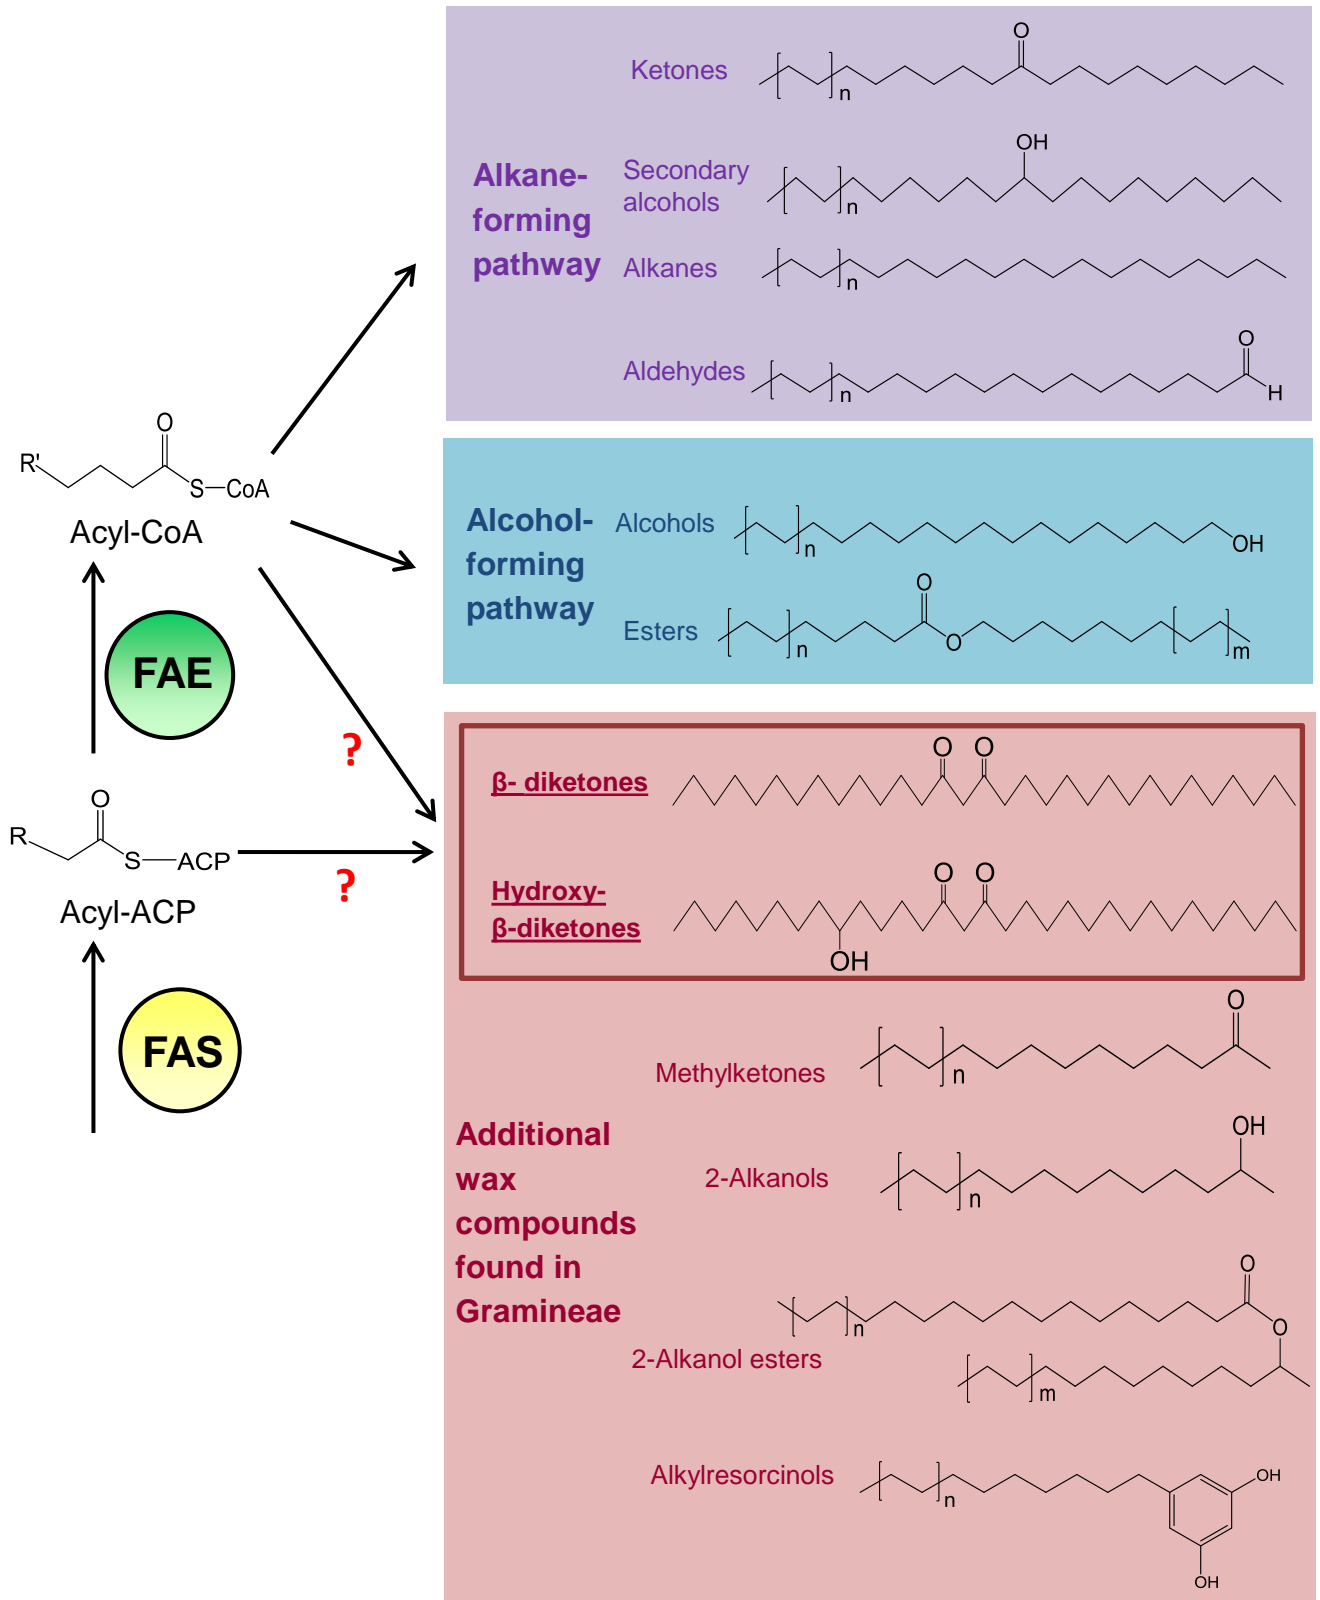

Supplemental Fig. 1

**Supplemental Figure 1. General scheme of biosynthetic pathways generating different cuticular wax components.** The alkane-forming (in purple) and alcohol-forming (in blue) pathways of cuticular wax biosynthesis. Many Gramineae species have additional wax compounds (in red).  $\beta$ -diketones and hydroxy- $\beta$ -diketones, synthesized through an independent pathway, are shown in a red rectangle. Methylketones, 2-alkanols and 2-alkanol esters are side products of the  $\beta$ -diketone biosynthesis pathway. The  $\beta$ -diketones may be derived from FAS products or FAE products. Alkylresorsinols are polyketides also found in many Gramineae species. FAS- fatty acid synthase system, FAE- fatty acid elongase system. n, m indicate varying chain lengths.

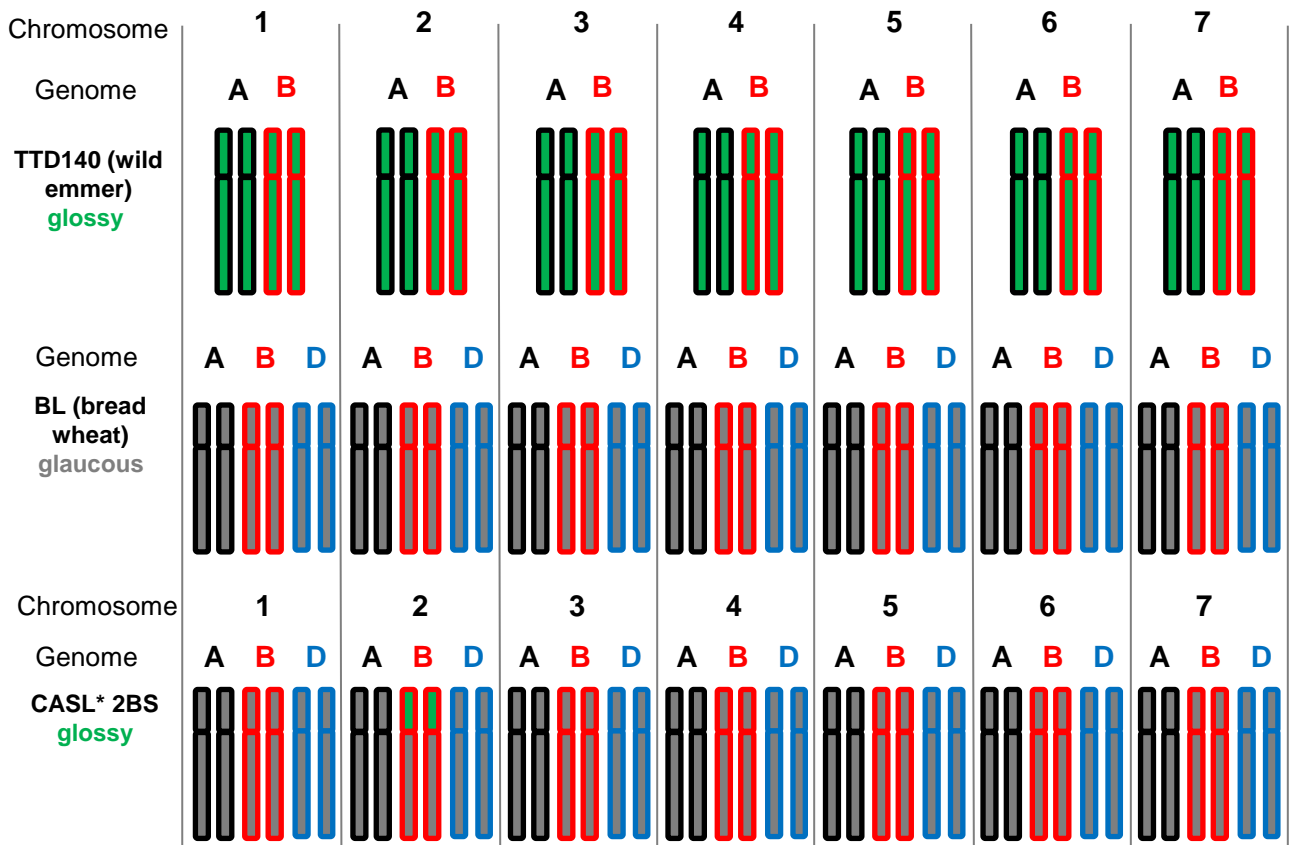

**Supplemental Figure 2. Illustration of wheat parental and chromosome arm substitution lines used in this study.** Wheat substitution lines used in this study were produced by Millet et al. (2013). A series of wild emmer [*Triticum turgidum* ssp. *dicoccoides* (line TTD140)] chromosome arm substitution lines (CASLs) were produced in the background of the modern common wheat [*Triticum aestivum* ssp. *aestivum* cv. Bethlehem (BL)]. In CASL\* 2BS, the whole 2BS arm from TTD140 was inserted to the BL genome background. The wax phenotype is indicated for each line. Grey and green chromosome colors indicates BL and TTD140-derived chromosomes, correspondingly.

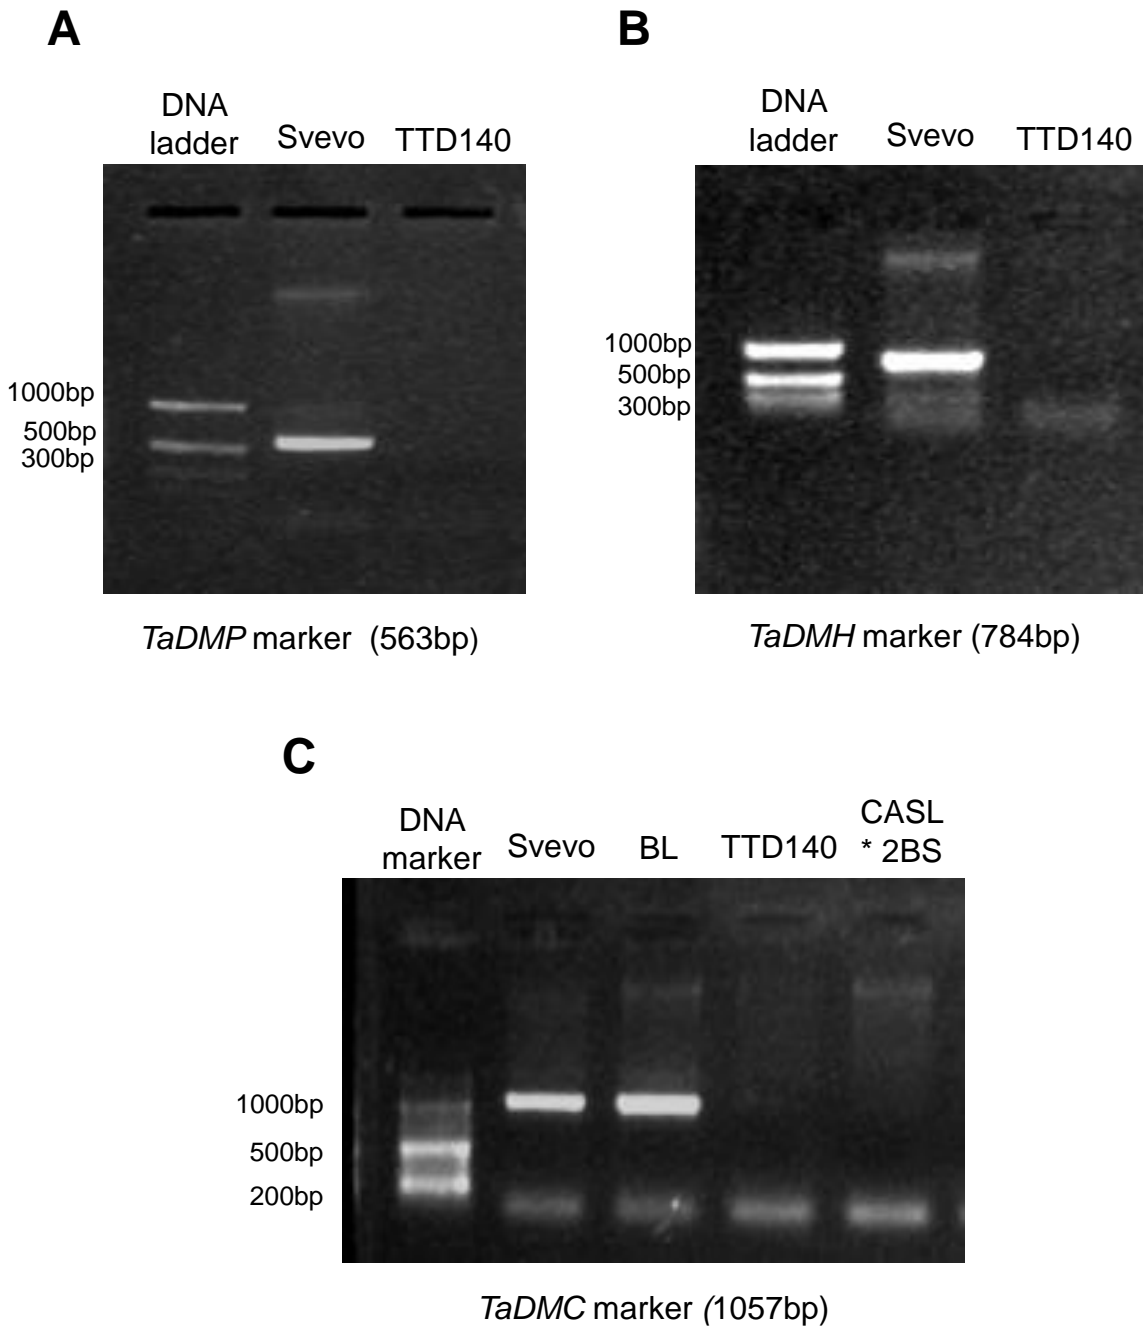

**Supplemental Figure 3. Amplification of markers developed for the three candidate genes in glaucous and glossy wheat.** The  $\beta$ -diketone biosynthesis candidate genes are present in the glaucous parental line 'Svevo' however absent in glossy parental line 'TTD140'. Specific markers were developed for *TaDMP* (**A**), *TaDMH* (**B**) and *TaDMC* (**C**). The marker developed for the *TaDMC* gene was also polymorphic in the hexaploid population while the other two were not, apparently due to homologues in the D genome.

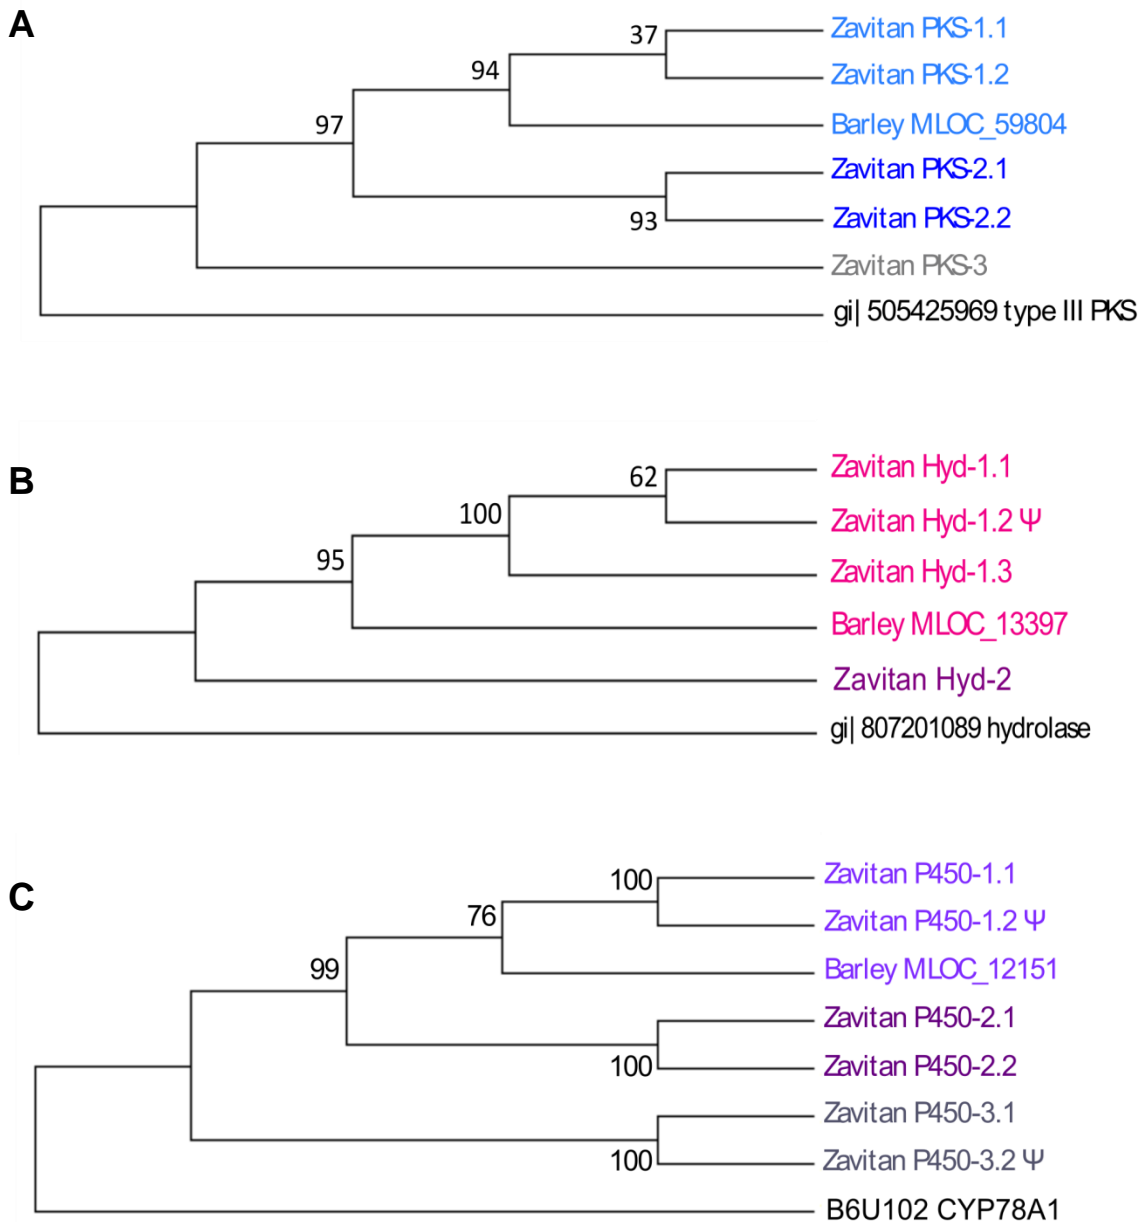

**Supplemental Figure 4. Phylogenetic trees of Zavitan proteins.** Phylogenetic trees describe the similarity between Zavitan and barley  $\beta$ -diketone proteins. **(A)** PKS, **(B)** Hydrolase (HYD) and **(C)** P450 phylogenetic trees. Sequences for the Zavitan proteins can be found in Supplemental File 1. Outgroup protein accessions are: For PKS tree: gj|505425969 (type III PKS from *Streptomyces fulvissimus*), for HYD: gj|807201089 (adenosylhomocysteinase from *Solanum lycopersicum*), for P450: B6U102 (CYP78A1 from *Zea mays*).  $\Psi$ - Premature termination codon (PTC). Closely related proteins are denoted with the same color.

**A**

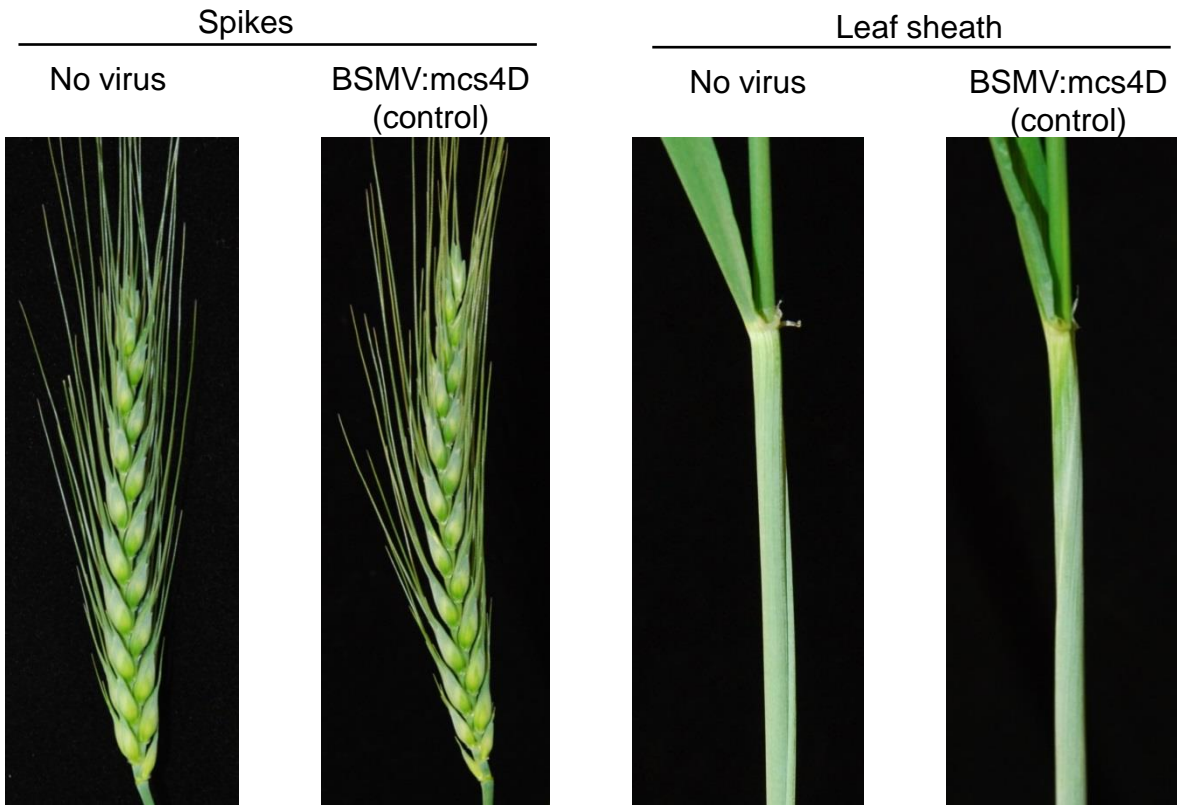

**B**

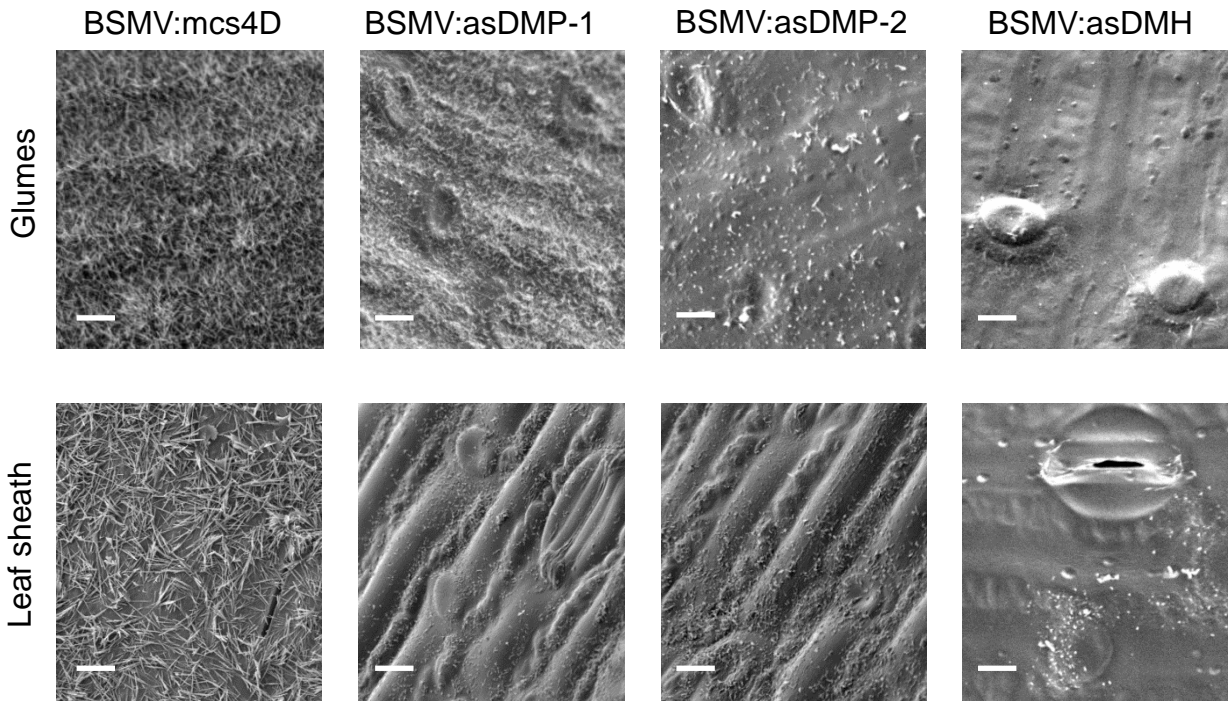

**Supplemental Figure 5. Virus-induced gene silencing (VIGS) of the  $\beta$ -diketone genes reduces wax accumulation and deposition of epicuticular wax crystals.** (A) Control infection with BSMV:mcs4D does not reduce glaucousness. Non-infected plants (no virus) and BSMV:mcs4D-infected (control) plants both have glaucous phenotype in glumes and leaf sheath (B) Epicuticular wax on surfaces of flag leaf sheath and glumes tissues was examined using scanning electron microscopy (SEM). Plants infected with constructs targeting the  $\beta$ -diketone biosynthesis gene transcripts (BSMV:*asDMP-1*, BSMV:*asDMP-2* and BSMV:*asDMH*) displayed reduced wax amount as well as reduced deposition of tubular wax crystals, typical for  $\beta$ -diketone-rich wax. Magnification: X500. Scale bar indicates 2  $\mu$ m.

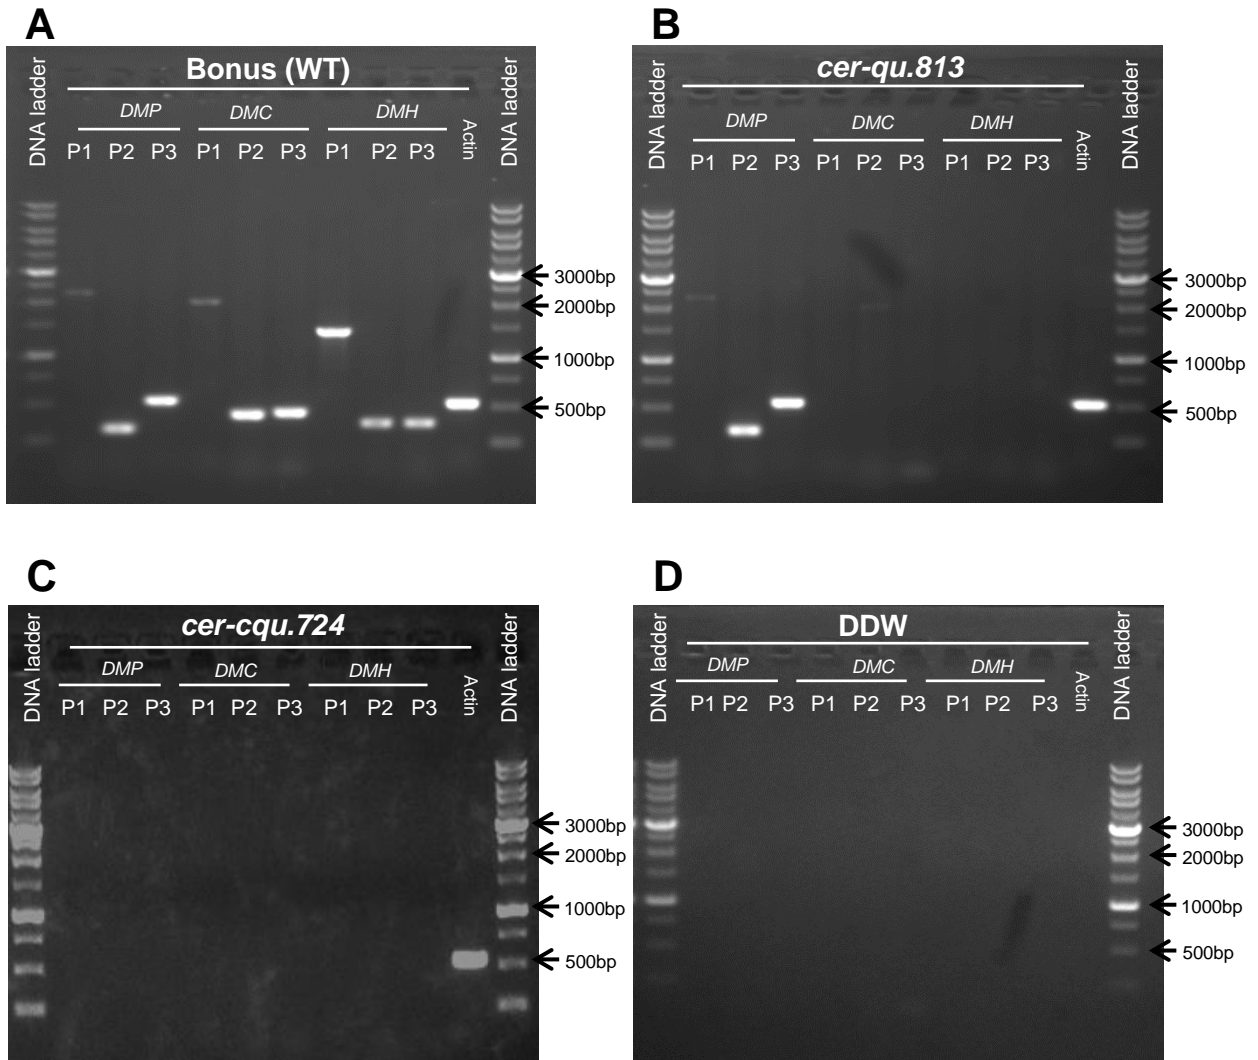

**Supplemental Figure 6. The barley *cer-qu.813* double and *cer.cqu-724* triple mutants have deletions that include the metabolic gene cluster genes.** Amplifications of the three candidate genes, *DMP*, *DMH* and *DMC*, were performed using three different primer pairs (P1- P3) per gene and genomic DNA template. Actin oligonucleotides were used as positive control, DDW as negative control. Agarose gels are shown for reactions using the following templates: **(A)** bonus (WT), **(B)** *cer-qu.813*, **(C)** *cer-cqu.724*, **(D)** DDW control. An unspecific band appears in the reaction mixture of *DMC* P2 primers and *cer-qu.813* gDNA, however has different product size from the corresponding reaction with WT template.



**A Peak at 7.5 min: pentadecan-2-one (C<sub>15</sub> 2-ketone)**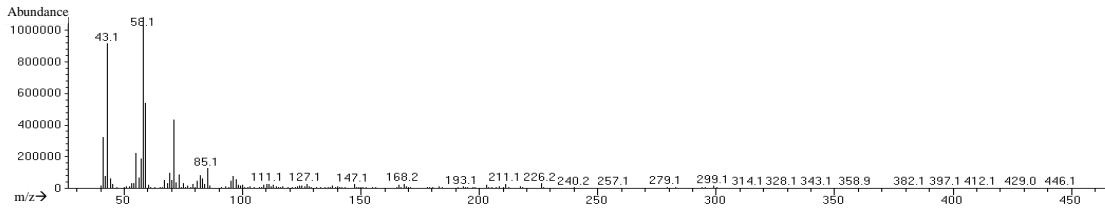**B Peak at 7.5 min: pentadecan-2-one (C<sub>15</sub> 2-ketone) standard**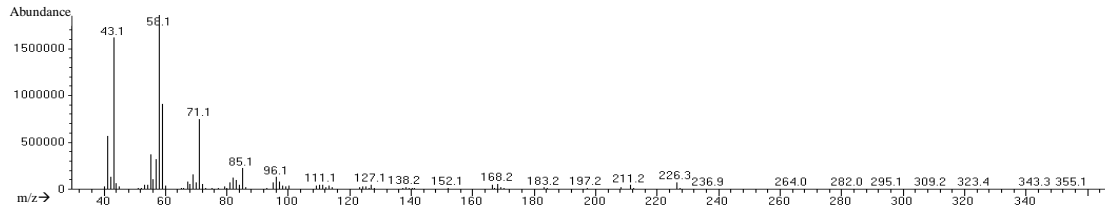**C Peak at 8.4 min: pentadecan-2-ol (C<sub>15</sub> 2-alkanol)**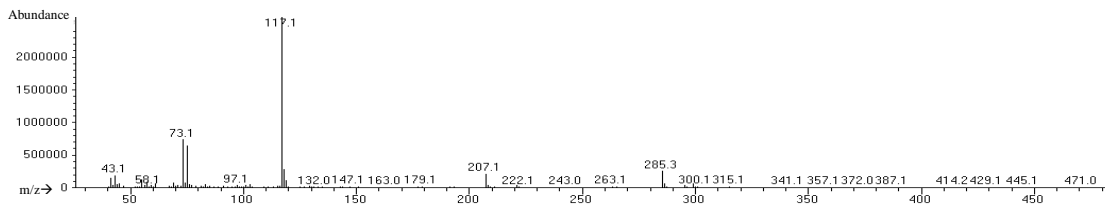**D Peak at 10.8 min: 3-OH tetradecanoic acid (C<sub>14</sub> 3-hydroxy-acid)**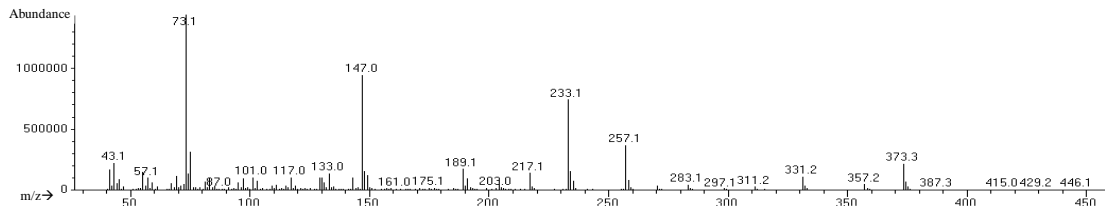**E Peak at 10.8 min: 3-OH tetradecanoic acid (C<sub>14</sub> 3-hydroxy-acid) standard**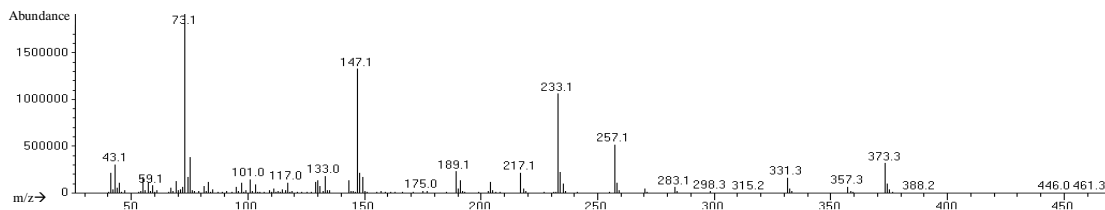

**Supplemental Figure 7. Compound identification of *E-coli* expressing DMH metabolites.** Gas chromatography mass spectrometry (GC-MS) spectra of increased compounds in lipids extracted from *E-coli* expressing DMH from barley (**A**, **C-D**) and commercial standards (**B**, **E**). (**A**) C<sub>15</sub> 2-ketone, RT 7.5 min (**B**) C<sub>15</sub> 2-ketone standard (Sigma, cat. W372404), RT 7.5 min. (**C**) C<sub>15</sub> 2-alkanol, RT 8.4 min. (**D**) C<sub>14</sub> 3-hydroxy-acid, RT 10.8 min. (**E**) C<sub>14</sub> 3-hydroxy-acid standard (Sigma, cat. H4148), RT 10.8 min.

## Supplemental Text 1: Fine genetic map of 2BS *W1/lw1* loci in different segregating populations

### Kofa+Lr19 (glaucous)x AUS2499 (glossy):

Out of 352 F<sub>2</sub> progeny screened we observed 271 individuals with a glaucous phenotype and 81 individuals with a glossy phenotype. This correlates well with the expected 3:1 segregation ratio for a single locus ( $\chi^2=0.74$ ,  $df=1$ ,  $P=0.3889$ ). Using genetic markers *W1\_1*, *W1\_2*, *W1\_3* and *W1\_4* (corresponding to markers *JIC005*, *JIC007*, *JIC009* and *JIC010*, respectively) we have mapped this single locus to the short arm of chromosome 2B between markers *W1\_3* and *W1\_4*; two recombinants were identified between markers *W1\_3* and *W1\_4*, giving a genetic distance of 0.57 cM. We then proceeded to screen another 4,423 F<sub>2</sub> progeny using markers *W1\_3* and *W1\_4*, giving a total of 4,775 F<sub>2</sub> plants screened (9,550 gametes) out of which 15 plants were shown to be recombinant between markers *W1\_3* and *W1\_4*. This represents a genetic distance of 0.16 cM. By selfing the 15 recombinants we obtained homozygous recombinants and verified both the mapping data as well as the phenotype. These results suggest that the dominant locus for  $\beta$ -diketone production designated *W1* is confined in a 0.16 cM interval flanked by markers *W1\_3* and *W1\_4*.

### Svevo (glaucous) x TTD140 (glossy)

In this population *lw1* derived from TTD140 segregates. Out of 299 F<sub>2</sub> progeny screened we observed 77 individuals with a glaucous phenotype and 222 individuals with a glossy phenotype, fitting a single locus 1:3 Mendelian segregation ratio ( $\chi^2=0.09$ ,  $df=1$ ,  $P=0.7674$ ). Using genetic markers *Xwmc661*, *W1\_3* and *W1\_4* we have mapped this single locus to the short arm of chromosome 2B completely linked to *W1\_3*; seven recombinants were identified between markers *Xgwm614* and *W1\_4*, giving a genetic distance of 1.17 cM. By selfing the 7 recombinants we obtained homozygous recombinants and verified both the mapping data as well as the phenotype.

## Supplemental Text 2: Analysis of the Zavitan *W1/lw1* interval

Using the wild emmer Zavitan genome sequence (unpublished) we analysed the genes within the interval between genetic markers *JIC036* and *JIC032* which include the *W1* locus and the three  $\beta$ -diketones candidate genes (see Figure 2C). We predicted 22 genes in this region, 15 out of the 22 were annotated similarly to the  $\beta$ -diketones candidate genes; six *CYP450* family (*P450*) genes, five *Type III polyketide synthase* (*PKS*) family members and four members of the *hydrolase/lipase* (*Hydrolase*; *HYD*) family.

Among the five *PKS* genes there are three distinct genes, two of which have been duplicated in tandem. One of the tandem duplicated genes has not been fully captured in the Zavitan genome sequence and only the first exon is present, but the gene is likely intact. The similarity between the tandemly duplicated genes is ~99.5%, indicating a relatively recent duplication event. Comparing the coding sequence (CDS) of these five genes against that of barley *MLOC\_59804* shows that one of the duplicated gene pairs (*PKS-1.1* and *PKS-1.2*) is more closely related than the other three genes, indicating that these are the likely orthologues. However, *MLOC\_59804* is also the best hit for *PKS-2.1* and *PKS-2.2*, suggesting that either their barley orthologue is missing from the database or that these are older duplicated versions of *PKS-1.1* and *PKS-1.2* (Supplemental Table 3 and Supplemental Figure 4A).

Among the four *HYD* genes there are two distinct genes, one of which has been duplicated twice (*HYD-1*). The similarity between these three genes is >99.6% indicating relatively recent duplication events. Comparing the CDS of these four genes against that of the barley *MLOC\_13397* showed that the triplicated gene pair (*HYD-1*) is more closely related than the other gene (*HYD-2*), indicating that the triplicated genes are the likely orthologues (Supplemental Table 3 and Supplemental Figure 4B). Interestingly, *HYD-1.2* has a single base pair deletion within its CDS, causing a frameshift and premature termination codon (PTC), suggesting that *HYD-1.1* and *HYD-1.3* are the functional orthologues of *MLOC\_13397*.

Among the six *P450* genes, three distinct genes are represented, all of which have been duplicated in tandem. The similarity between the tandemly duplicated genes

is >99.3% indicating relatively recent duplication events. Comparison of the CDS of these six genes against that of *MLOC\_12151* showed that one of the duplicated gene pairs (*P450-1.1* and *P450-1.2*) is more closely related than the other four genes, indicating that genes in this pair are the likely the orthologues (Supplemental Table 3 and Supplemental Figure 4C). Similar to the *HYD* example, *P450-1.2* has a single base pair deletion within its CDS, causing a frameshift leading to a PTC. This suggests that *P450-1.1* is the only functional orthologue of *MLOC\_12151*. The orthologous loci of the other *P450* genes appear to be *MLOC\_13649* and *MLOC\_71974*. Notably, *P450-3.2* also has a PTC.

The pattern of gene duplications within the *Zavitan* interval has occurred after the divergence from barley based on the high sequence similarity of the duplicated genes (>99.3 % in all cases). Moreover, the position of the genes within the interval provides clues as to how those duplications occurred. The arrangement of the genes within the interval precludes a large scale duplication event and is most consistent with a series of independent small scale local duplication events.

One duplication consists of *PKS-1.1* and *PKS-1.2*, the two genes most closely related to *MLOC\_59804*. Another block includes the duplication of *P450-1.1*, *HYD-1.1* and *Hly-1.1* into a second block (*P450-1.2*, *HYD-1.3* and *Hly-1.2*) which was followed by the separate duplication of *HYD-1.1* into *HYD-1.2*. A third duplication block within this interval encompasses *PKS-2*, *P450-2* and *P450-3* (see Figure 2C).

In addition to  $\beta$ -diketones candidate genes, two more relevant genes were found to be located in the *W1/lw1* *Zavitan* interval: wax ester synthase (*WES*) and *CYP96B30* (*P450-3.1*). The genes annotation as wax related and their genomic localization suggests that they might also be involved in  $\beta$ -diketones or related metabolites biosynthesis.

### Supplemental Text 3: Comparison of the *W1//lw1* interval between the wild emmer accessions TTD140 and Zavitan

Genetic markers *JIC007/IWB7407* (distal) and *JIC010/CD927782* (proximal) (see Figure 2C) which are flanking both the *W1* and *lw1* interval were used to anchor genomic sequence of Zavitan (glaucous) and TTD140 (glossy). The distal TTD140 and Zavitan sequences are 97.6% similar over ~8 kb of intergenic, exon and intron sequence. Proximal to the *W1//lw1* interval the similarity is only 93% over ~18 kb of intergenic, exon and intron sequence, but this rises to 96% if corrected for gaps in the alignment. (Figure 2C, Supplemental Table 3). However, the interval between these highly similar regions is completely different between TTD140 and Zavitan, both for the intergenic space and also for the gene content, with the exception of two NB-Arc-like genes (NB-Arc-like\_1 and \_2; Figure 2C). These two genes are located at the distal border of the conserved interval in Zavitan and TTD140. However, in the latter the NB-Arc like genes have undergone a series of tandem duplication events; the available sequence of TTD140 suggests at least 13 copies, but there are likely more. The duplications in TTD140 are not restricted to the open reading frames themselves, but also include intergenic sequence and transposable elements.

None of the other genes identified in Zavitan can be found in the TTD140 physical map covering the *W1//lw1* interval. This could be attributed to the incomplete state of the TTD140 physical map. But the reverse is also true, i.e. none of the genes identified in TTD140 can be found in the Zavitan whole genome assembly. Interestingly, the TTD140 physical map contains two P450 and two PKS genes, but these have low similarity (~85 % in the nucleotide level) to the *P450* and *PKS* genes identified in the Zavitan interval (see Supplemental Table 3). In summary, at least 808,361 base pairs of TTD140 sequence (excluding the region of tandem duplicated NB-Arc-like genes) are completely different in the Zavitan whole genome assembly, suggesting a divergence in haplotype between these two wild emmer accessions across the *lw1//W1* interval.

The haplotype divergence is supported by the observation that no recombinant plants between markers *JIC036* and *JIC032*, the two markers closest to the interval, were observed in F<sub>2</sub> progeny of a cross between three different mapping populations in

which TT140 is a parent or the 2BS is derived from TTD140 (CASL\*2BS). The studied populations were TTD140 and *T. durum* cultivar Langdon (glaucous; *iw1/iw1*; *W1/W1*), TTD140 and *T. durum* cultivar Svevo and CASL\*2BS and *T. aestivum* cultivar BL. Based on the disparity in sequence content between TTD140 and Zavitan we hypothesise that Langdon and TTD140 also have equivalent sequence disparity, i.e. different haplotypes between markers *JIC036* and *JIC032*. Recombination numbers from Langdon X TTD140 population are given in purple in Figure 2C.

Supplemental Table 1: Linked deleted markers in the TTD140 accession detected by the 90K chip analysis

| Number | SNP name                     | Reside inside $\beta$ -diketone gene | SNP ID   | Marker sequence                                                                                                                                                                                                      | Index on iSelect 90K SNP bead chip |
|--------|------------------------------|--------------------------------------|----------|----------------------------------------------------------------------------------------------------------------------------------------------------------------------------------------------------------------------|------------------------------------|
| 1      | wsnp_Ra_rep_c106727_90434958 | DMP                                  | IWA8128  | AGGTCCATGGTGTCTGCTACCAGTGTGGGCAGTTGGTGTAAACTTTCCCATGAGTGC<br>CATTGCTCCCCAAGTTTCAGGGTGCAGACATTCTCAGTGCTC[A/G]GCACGAGGGTCTGA<br>GAGACGGACCCATCTCAAACAGAGGATTCTCGATGGGGTGCATGGGGTTGGCGCCG<br>ACGATTACCGCGCTGCCCATCACAAA | 81290                              |
| 2      | RAC875_rep_c109471_154       | DMP                                  | IWB61884 | CCCACCTTATCGTCAGCACCAACTCTGACACTGGCGCCCCAAGCGCTGAC[A/G]TACGC<br>TTGGTTTCACTCCTTGGCCTTCGCGCCGATGCTCTGCATACCATG                                                                                                        | 61884                              |
| 3      | RAC875_rep_c115433_378       | DMP                                  | IWB62322 | CAAACCTGCCACACTGGTAGCAGACACCATGGAACCTTGTCTTCTGGAAG[T/C]GTTTG<br>GTCCACTTGAGATGGACTTCCAAT                                                                                                                             | 62322                              |
| 4      | wsnp_Ex_c851_1654297         | DMC                                  | IWA4808  | GCAACCGKAKGACTGGAAGCGCGCGCAAATTCACCCCGGCTTTTCAGCCAAAG<br>AGAAGATCAAGTCCATGTCAGCAATAACGTTGGAGTGCACAC[A/G]GCAGATGATGGAA<br>CAGTGGCGCACTCAATGCAGGAGACACATGCAGCAAGCCGAGATCGACATGAGG<br>TACGACTCCGATGACATAGCAATGCGTGTC    | 78868                              |
| 5      | wsnp_Ra_c1660_3275687        | DMC                                  | IWA7656  | TTGATGATGGTTCGCTATCACAATCTGCACCTCAACCATGGCGAAGTTTTGCCCGGCACA<br>AACCTCGGCCGAATGAGAAGGCCAGCAGCGCTGTAAT[A/G]CTTGGCGGCTCTC<br>GATAAGCCATTCTGGAACCTCATCGGATTAACCTGTCGGCGTGGGTCCCCAAATCTC<br>CTTGCCCGGTGCAACAAAATAATGGT   | 80948                              |
| 6      | Ra_c2544_1566                | DMC                                  | IWB51601 | CTCTTGGCTGAAAGCCGGGTGGATGAATTTGCGCCGCGCTCCAGTCGT[A/C]TCCGT<br>TTGCAATATTACCCCGTTCCCTAGAAATTGCTTCCAAACTGGGAT                                                                                                          | 51601                              |
| 7      | RAC875_c9013_185             | DMC                                  | IWB60992 | AAGACTGCCTCAGACACTATCTAACGCACGTGAAGGTGCCGAAAGGAAC[A/G]ATGAT<br>AACAAACCAATTAGTTTTGTGTCACCGGACAAGGAGATTTGGGG                                                                                                          | 60992                              |
| 8      | BS00084667_51                |                                      | IWB11378 | GTCACCCTCTGCCCGCAGCTGAGGCCACTAAACCAACATTCATTGGTGT[C]GAAGG<br>ATTTGAGGGCGACTATGGTGAATTGAGTTTGGTAACGAGGAAGC                                                                                                            | 11378                              |
| 9      | Ra_c491_902                  |                                      | IWB52168 | ATACCATTAGTTTTGTTGCACCGGGACAAGGAGATTTGGGG                                                                                                                                                                            | 52168                              |
| 10     | wsnp_Ex_c1996_3754394        |                                      | IWA2482  | CGTGCATGATCATTGGCTACATGTTTCGCTGCTAGGATACAGTTGGAACAACCCTGA<br>CATGGATCTTCTACAACTCGCCAGAACCTAACATTGTTTT[C]GAATATCCGAAAAG<br>AACTCTACCCATTGCATCAGCAAGCAGCGGTTGGTGTGGATGCCATGTTGATCTTT<br>GAGCCAAAAGAGACCAGATCTCTAGTA    | 77079                              |
| 11     | Ra_c11464_294                |                                      | IWB50940 | GCATCAACGCTATGGAACCTCGATGTGGAGGTGATGGACGGGCAACAAT[T/C]CAGCC<br>CAAGCAAGCTTGTATACAGCAGATGAAAAATGGGCTCATAGTTAA                                                                                                         | 50940                              |
| 12     | BS00023068_51                |                                      | IWB7407  | TACTTGCTTTGCACTGGCACTTCTAGTAGTAGTTCCCCGAACGTTGACTGT[C]AAATATG<br>CGAGGATTTCCAACCTTGTGGTTCATCACCAGGACAGTAGTT                                                                                                          | 7407                               |

Supplemental Table 2: Markers and oligonucleotides used for linkage analysis

Kofa+Lr19 x AUS2499 population

|   | Marker | Kofa+Lr19 allele          | AUS2499 allele            | Common oligonucleotide     | corresponds to |
|---|--------|---------------------------|---------------------------|----------------------------|----------------|
| 1 | W1_1   | TAACGCCGCTCCTCTCGT        | TAACGCCGCTCCTCTCCTT       | TCAGTTGGGTATTTCTCTCCAG     | JIC005         |
| 2 | W1_2   | ACTTCAAATGTGATGTGCTTGCTT  | ACTTCAAATGTGATGTGCTGCTC   | CGACAGTCGGATTCTTCTTACC     | JIC007         |
| 3 | W1_3   | CAGAAGACTGCACACACATTACTTG | CAGAAGACTGCACACACATTACTTT | CCAGTTAAGTGAACACAGTGATCT   | JIC009         |
| 4 | W1_4   | CGTGAGCTGCTAAACAAGGTG     | CGTGAGCTGCTAAACAAGGTA     | AGAGAAGTGCCTTGAGACATATTTAC | JIC010         |

Svevo x TTD140:

|    | Marker                                    | Forward oligonucleotide (5'-3') | Reverse oligonucleotide (5'-3') | Tm (°C) | Type      | Amplicon length (bp) |
|----|-------------------------------------------|---------------------------------|---------------------------------|---------|-----------|----------------------|
| 1  | <i>Xwmc764</i>                            | CCTGGAACCTGAAGCTCTGA            | TTCCGAAGGACTCCGTAACA            | 61      | SSR       |                      |
| 2  | <i>RAC875_c38665_247 (WB57438)</i>        | TGCTGAGTGCACAAAGCATTGC          | TGGGTATAAGTTGAGCATGCAGTT        | 59      | SNP (HRM) |                      |
| 3  | <i>Xwmc661</i>                            | CCACCATGGTGTAAATAGTGTG          | AGCTCGTAACGTAATGCAACTG          | 60.8    | SSR       |                      |
| 4  | <i>Xqwm614</i>                            | GATCACATGCATGCGTCATG            | TTTTACCGTTCGGCCTT               | 60      | SSR       |                      |
| 5  | <i>BS00027693_51 (WB7661)</i>             | GCTGTGTAACCTGAAGACCATC          | TCATCATGCACCATCAGTCA            | 59      | SNP (HRM) |                      |
| 6  | <i>CD893659 (JIC009)</i>                  | CAAATTAAGCAACAATAACACGA         | GCTAGGGTATTACTGTACACC           | 58      | PCR       | 723bp                |
| 7  | <i>TaDMC gene<sup>A</sup></i>             | CTGACCCATCAAGGCAGTT             | CTTCAGTTGCTCCCTCCTG             | 68      | PCR       | 1057bp               |
| 8  | <i>TaDMH gene<sup>A</sup></i>             | CCGGTGCCGACGCTCCTACGAT          | TGGGAGCTTGCTTCAAAGGTA           | 65      | PCR       | 784bp                |
| 9  | <i>TaDMP gene<sup>A</sup></i>             | GGTTACTGCACCGAGACCAT            | TGAAACCAGCGTACGCTGAG            | 67.5    | PCR       | 563bp                |
| 10 | <i>CD927782 (JIC0010, WB43910)</i>        | CTGTGTAACCTGAAGACCATCACC        | GCACCATCAGTCACATGCTTA           | 60      | SNP assay |                      |
| 11 | <i>CD927782 (JIC0010, WB43910) probes</i> | allele one- CAACGATGCCGCTCT     | allele two-CAACGATGCTCGTCTTG    | 60      | SNP assay |                      |

<sup>A</sup> Dominant in Svevo, null in TTD140



**Supplemental table 3: Homology between Zavitan, TTD140 and the corresponding barley genes****TTD140 vs Zavitan flanking sequence similarity**

|               | Intergenic/exon/intron |                |
|---------------|------------------------|----------------|
|               | Identities             | gaps           |
| Distal side   | 7827/8019 (97.6%)      | 72/8019 (0%)   |
| Proximal side | 17008/18287 (93%)      | 475/18287 (3%) |

**TTD140 vs Zavitan gene similarity**

|              | PKS 1.1        |              | PKS 1.2        |              | PKS 2.1        |              | PKS 2.2       |            | PKS 3          |              |
|--------------|----------------|--------------|----------------|--------------|----------------|--------------|---------------|------------|----------------|--------------|
|              | Identities     | gaps         | Identities     | gaps         | Identities     | gaps         | Identities    | gaps       | Identities     | gaps         |
| TTD140_CHS-1 | no alignment   |              | no alignment   |              | no alignment   |              | no alignment  |            | no alignment   |              |
| TTD140_CHS-2 | 969/1192 (81%) | 26/1192 (2%) | 966/1187 (81%) | 26/1187 (2%) | 966/1192 (81%) | 26/1192 (2%) | 116/135 (86%) | 0/135 (0%) | 768/1167 (66%) | 59/1167 (5%) |

|               | P450 1.1        |                | P450 1.2        |                 | P450 2.1       |              | P450 2.2       |              | P450 3.1     |      | P450 3.2     |      |
|---------------|-----------------|----------------|-----------------|-----------------|----------------|--------------|----------------|--------------|--------------|------|--------------|------|
|               | Identities      | gaps           | Identities      | gaps            | Identities     | gaps         | Identities     | gaps         | Identities   | gaps | Identities   | gaps |
| TTD140_P450-1 | 1326/1556 (85%) | 9/1556 (0.58%) | 1322/1556 (85%) | 10/1556 (0.64%) | 957/1117 (86%) | 30/1117 (3%) | 955/1117 (86%) | 30/1117 (3%) | no alignment |      | no alignment |      |
| TTD140_P450-2 | no alignment    |                | no alignment    |                 | no alignment   |              | no alignment   |              | no alignment |      | no alignment |      |

**Barley vs Zavitan gene similarity**

|                                | PKS 1.1        |            | PKS 1.2        |            | PKS 2.1        |            | PKS 2.2      |           | PKS 3         |             |
|--------------------------------|----------------|------------|----------------|------------|----------------|------------|--------------|-----------|---------------|-------------|
|                                | Identities     | gaps       | Identities     | gaps       | Identities     | gaps       | Identities   | gaps      | Identities    | gaps        |
| MLOC_59804/AK375690<br>1182 bp | 1107/1181(94%) | 0/1181(0%) | 1107/1182(94%) | 0/1181(0%) | 1084/1181(92%) | 0/1181(0%) | 131/147(89%) | 0/147(0%) | 785/1154(68%) | 33/1154(2%) |

|                                | P450 1.1       |            | P450 1.2       |                | P450 2.1      |             | P450 2.2      |             | P450 3.1     |      | P450 3.2     |      |
|--------------------------------|----------------|------------|----------------|----------------|---------------|-------------|---------------|-------------|--------------|------|--------------|------|
|                                | Identities     | gaps       | Identities     | gaps           | Identities    | gaps        | Identities    | gaps        | Identities   | gaps | Identities   | gaps |
| MLOC_12151/AK373499<br>1548 bp | 1444/1545(93%) | 0/1545(0%) | 1440/1545(93%) | 1/1545(0.006%) | 947/1116(85%) | 21/1116(1%) | 945/1116(85%) | 21/1116(1%) | no alignment |      | no alignment |      |

|                       | HYD 1.1        |                | HYD 1.2        |                | HYD 1.3        |                | HYD 2        |            |
|-----------------------|----------------|----------------|----------------|----------------|----------------|----------------|--------------|------------|
|                       | Identities     | gaps           | Identities     | gaps           | Identities     | gaps           | Identities   | gaps       |
| MLOC_13397<br>1230 bp | 1110/1235(90%) | 7/1235(0.056%) | 1108/1235(90%) | 8/1235(0.064%) | 1112/1235(90%) | 7/1235(0.056%) | 717/993(72%) | 36/993(3%) |

Supplemental Table 4: Oligonucleotides used in this study

| no. | primer Fwd name | primer Fwd seq 5'-3'                                                | primer Rev name | primer Rev seq 5'-3'                                                      | Figure   |                          |
|-----|-----------------|---------------------------------------------------------------------|-----------------|---------------------------------------------------------------------------|----------|--------------------------|
| 1   | TaPKS_RT_F1     | GTTGGAGCCACGAAGCTAG                                                 | TaPKS_RT_R1     | GACGCCGTAGCTCATCAAGC                                                      | Figure 3 |                          |
| 2   | TaHyd_RT_F1     | GACGAATTCTACCCATTAATCC                                              | TaHyd_RT_R1     | GGACACACCGGTGCCCTG                                                        |          |                          |
| 3   | TaP450_RT_F1    | GGCAAATTGAAGCTGCTCAAC                                               | TaP450_RT_R1    | TTCGGCACCTTCACATGTG                                                       |          |                          |
| 4   | ACT2_RT_F       | CAATCATGTTTGAGACCTCAATG <sup>1</sup>                                | ACT2_RT_R       | ACCAGAATCCAACACGATACCTG <sup>1</sup>                                      | Figure 4 |                          |
| 5   | PKS_VIGS_F1     | AACCACCACCACCGTGGTTACTGCACCGAGACC <sup>2</sup>                      | PKS_VIGS_R1     | AAGGAAGTTTAACTTCTTTGCTGCTGCTG <sup>2</sup>                                |          |                          |
| 6   | PKS_VIGS_F2     | AACCACCACCACCGTCACACTGGTAGCAGACACC <sup>2</sup>                     | PKS_VIGS_R2     | AAGGAAGTTTAAAGCTGCGTACATAGCTTAACG <sup>2</sup>                            |          |                          |
| 7   | Hyd_VIGS_F1     | AACCACCACCACCGTGTGAGGACCATGGCTTC <sup>2</sup>                       | Hyd_VIGS_R1     | AAGGAAGTTTAACTCATCACGAATCTTACC <sup>2</sup>                               |          |                          |
| 8   | TaPKS_RT_F2     | CCATCTTAAACGGTGTCTC                                                 | TaPKS_RT_R2     | CTGCAGAAGCCAGAAATG                                                        |          |                          |
| 9   | TaHyd_RT_F2     | ATGACAGCATCATGGACATC                                                | TaHyd_RT_R2     | CACTGGTGGGAACATGG                                                         |          |                          |
| 10  | CDC48_RT_F      | GTCTCTGGCTGGTAAAAC <sup>3</sup>                                     | CDC48_RT_R      | AGCAGCTCAGGTCCCTTGATAC <sup>3</sup>                                       |          |                          |
| 11  | MLOC_59804_F1   | CCATAATTGTTTAGTCTGCTGC                                              | MLOC_59804_R1   | AATCAAATAACATTTGGGTGAG                                                    |          | Figure 5, Supp. Figure 6 |
| 12  | MLOC_59804_F2   | CAGTCCATAATGTTTAGTCTGCTGC                                           | MLOC_59804_R2   | CTACAAAGTGAAGGTGTGTGC                                                     |          |                          |
| 13  | MLOC_59804_F3   | CGTTGACCCACATTTTCAG                                                 | MLOC_59804_R3   | GGAGTTGAGCAGTTCATCC                                                       |          |                          |
| 14  | MLOC_13397_F1   | TCGTCAACATATCCCGTAG                                                 | MLOC_13397_R1   | ACTCCAGACGTGATCATAACC                                                     |          |                          |
| 15  | MLOC_13397_F2   | GGTTGGTCATGGTGCATC                                                  | MLOC_13397_R2   | GCTCTTATAAGCTTCTTGCTG                                                     |          |                          |
| 16  | MLOC_13397_F3   | CCATGGTGATCCAGATG                                                   | MLOC_13397_R3   | CAATGTTCCATTGCAATACC                                                      |          |                          |
| 17  | MLOC_12151_F1   | GAAAAACATTCTGTACTGGTTG                                              | MLOC_12151_R1   | CAGTATTACTAAGTCTTCTGTAAC                                                  |          |                          |
| 18  | MLOC_12151_F2   | AACATTCTGTACTGGTTGG                                                 | MLOC_12151_R2   | GAGTCGTGCATCATGTCG                                                        |          |                          |
| 19  | MLOC_12151_F3   | GGAAGGATGTTAAAGCTGCTC                                               | MLOC_12151_R3   | GAACATGGCCCAGGTAATAAG                                                     |          |                          |
| 20  | MLOC_59804_RT_F | TGTCCCAAGAAGAGTACCCCTGAC                                            | MLOC_59804_RT_R | GCCCGTGAGACCACATATTATCT                                                   | Figure 5 |                          |
| 21  | MLOC_13397_RT_F | CCAACATAATATAGATCTGACAGC                                            | MLOC_13397_RT_R | GGTGACGGGTGACCTACG                                                        |          |                          |
| 22  | MLOC_12151_RT_F | TCCTGTACTGGTTGGGACC                                                 | MLOC_12151_RT_R | TTGGAACATGTCTGTCTG                                                        |          |                          |
| 23  | HvActin RT_F    | GCCGTGCTTTCCCTCTATG <sup>4</sup>                                    | HvActin RT_R    | GCTTCTCTTGATGTCCCTTA <sup>5</sup>                                         |          |                          |
| 24  | Hyd_RF_F        | TCCGCGGGTAAAACCTGTACTTCCAGGGT<br>CCTGCAACAAGACTTACCCTC <sup>5</sup> | Hyd_RF_F_R      | GTGGTGGTCTCGAGTGCGGCCGCAAGCTTTTA<br>GAAACAGTTGTTTCATCATGGATC <sup>5</sup> | Figure 6 |                          |

<sup>1</sup>Wheat actin gene [TC234027] (Tenea, G.N., et al., Reference genes for gene expression studies in wheat flag leaves grown under different farming conditions. BMC Res Notes, 2011. 4: p. 373.)

<sup>2</sup>Sequences complementary to the target gene cDNA sequence are underlined. Ligation independent cloning (LIC) adaptor sequences are shown in bold.

<sup>3</sup>Wheat cell division cycle 48 [Unigene Ta.46201]

<sup>4</sup>Barley actin gene [GenBank: AY145451] (Kapazoglou, A., et al., Epigenetic chromatin modifiers in barley: IV. The study of barley polycomb group (PcG) genes during seed development and in response to external ABA. BMC Plant Biol, 2010. 10: p. 73.)

<sup>5</sup>Sequences complementary to the target gene cDNA sequence are underlined. Restriction free (RF) sequences adaptors from pET28.TEV are shown in bold.

**Supplemental File 1:** Gene Sequences of  $\beta$ -diketone biosynthesis and those annotated in the genome of the Zavitan accession.

**$\beta$ -diketone genes from *T. aestivum* cultivar Bethlehem (BL):**

**>TaDMP**

**ATG**GCAGGCAGCTCACCGAAGGTTAGTGAGATCCGGTGTGCGCAGCGTGCGGAAGGCTCCGCGGCAATGCTGGCTATCGGAACAGCAAATCCGGCGAACAAGGTGTCCCAAGAAGAGTACCCTGACTATTATTTCCGCGTTACCAAGAGCGAGCACCTTACTGACCATAAAGACACATTCAAGATAATATGTGGTCTAACGGGCACGGAGAATCGTTTTCTTCTACCACACGGATGAACTGCTCAACTCCCACCTGTCTTGCTGGACAACACGTCACCGTCCCCTGAGGCTCGGCATGATATCGTGGCCAAGGCTGCTCCAGAGCTTGCGGCAGCAGCAGCAAAGAAGGCCATCGCAAAGTGGGGCCGTCCGGCCAGTGACATCACCCACCTTATCGTCAGCACCAACTCTGACGCTGGCGCCCAAGCGCTGACGTACGCTTGGTTTTCACTCCTTGGCCTTCGCGCCGATGTCTGTCTGCTACCATGCTCCATCTTAACGGCTGCTTCGCCGGCTGCTCCGCCTTGCCTAGCCAAGGACCTTGCTGAGAATAACTGTGGGGCACGCGTCTCGTAGCTTGGCTGGAGCTCGCCATTTCTGGCTTCTGCAGCCCCGGCGAAGGGGACTGCTTAGACACCCTCATCACTCATGCGTTGTTTGGTGATGGGGCAGGCGCGGTAATCGTCGGCGCCGACCCCATGCACCCCATCGAGAATCCTCTGTTTGGAGATGGTGCTCGTCTCTCAGACCCTCGTGCCGAGCACTGAGAATGTGCTCACCCCTGAACTTGGGGAGCAATGGCACTCATGGGAAAGTTTACACCAAACGCCCACACTGGTAGCAGACACCATGGAACCTTGTCTTCTGGAAGCGTTTGGTCCACTTGAGATGGACTTCCAATGGAATGACCTCTTCTGGGCAGTGCACCCTGGCAGCCGTGGGATCTTGGACCAACTTGACAAGCACTCCAGTTGGAGCCCACGAAGCTAGCGGCAGCAGAAGTGTCTGACAGAAGTTTGGGAACATGTTTAGCGCCACCCTGATCTTCGTGCTTGATGAGCTACAGCGTCGAATGGAGGAGGAAGGAGAGCAAGCTGAGTGGGGGGCCATGGTGGGATTTGGACCAGGCTTCACTATCGAGACCATGGTGTCCATGCAACCCGGCGCTCTCAAGAAAAAT**TAG**

**> TaDMP\_protein**

MAGSSPKVSEIRCAQRAEGSAAMLAIQTANPANKVVSQEEYPDYYFRVTKSEHLTDHKDTFKIICGLTGTENRFFYHTDELLNSHPVLLDNTSPSREARHDIVAKAAPELAAAAAKKAIKWGRPASDIITHLIVSTNSDAGAPSADVRLVSLGLRADVCRMLHLNGCFAGCSALRLAKDLAENNCGARVLVACVELAISGFCSPEGDCLDTLIHALFGDGAGAVIVGADPMHPIENPLFEMVSVSQTLPVSTENVLTLNLGSNGTHGKVYTKLPTLVADTMEPCLLEAFGPLEMDFQWNDLFWAVHPGSRGILDQLDKTLQLEPTKLAASRTVVQKFGNMFSAIVIFVLDELQRRMEEEEGEQAEWGAMVGFPGFTIETMVLHATGALKKK\*

**>TaDMH**

**ATG**CCTGCAAACAAGACTTACCCCTCCCATAAGAATGCCAACGGTGAGGTGGACGATGAATTCTACCCATTAATCCGCAAGTACAAGGATGGCCGGATCGAGCGGTTTCATGAGCTCATTCGTGCCGGCGTCGGAGGACCCGGCCGACAGTTCGTGGTGTGGTGACGAGGGACGTCGTCATCGACCAGGGCACCGGCGTGTCCGTGCGCCTGTTCTTCCCTGTCCAGGCTGCCAGGCTGGCACGAGGCTCCCCCTTGTGTGTACGTCCATGGTGGTTCCTTTTGCACGGAGAGTGCCTTCTCCCGGACGTACCACCGTTACGCCACTTCCCTCGCCGCCAGCGCTGGGGCGCTCATCGTGTCCGTGGAGTACCGTCTGGCGCCGGAATATCCCGTGCCAACGTCTACGATGACACATGGCCCGCTGCGGTGGGTGGCGTCCCTTGTCCGACCTTGGCTCGCCAAGTACGCAGACCCTAGCCGCACATTCCTCGCCGGCGACAGCGCCGGCGGCAACATCGTGTACCACACGGCCGTGCGCGCCACACGTGATGACAGCATCATGGACATCCAGGGGTTGGTTCATGGTGCATCCATTCTTCTGGGGCCCCGAGCGTCTCCCGGCGGAGAAGGTTTTGGACGGCGACCCATGTTCCCGCCAGTGTGGGTGGATAAGCTGTGGCCCTTCGTGACGGCGGCGGGGCTGGCAACGATGATCCTCGGATCAATCCTCCGGACGAGGAGATCGCGTTGCTAACTGGCAGGCG

GGTGCTTGTGGCCATTGCAGAGAAGGACACCCTGCGCGACCGGGGGCGCCAGTTTGTGTGCAGCATGCGC  
GGGTGTGGGTGGGTGATGGCAGCCTCACCCTGGTGGAGTCGGAGGGTGAGGACCATGGTTTTCCATCTGT  
ATGCTCCCCTACGTGCGACCAGCAAGAAGCTTATGAAGAGCATCGTGCAGTTCATAAACCATCGCGCCAC  
CTTGCCGTCACCGGCCATGGTGTATCCCAGGAGGCTCGGCCGAAACTATGCTAGGCGTCCCTAGTAGGCCA  
TTTAAGGACATATTTGGCTACGGGATGCGCATGAAACGTTGGAGTGGCACGAGTTTGGGGCTCAAAGTTG  
GTCGTGCAAAAGCATCGACGACGAGCTATGGGTACGTTTGAAGCAAGCTCGTACCTTCGGAGACCCTGT  
TTCAGCACCAACTTCGGTAAGATTCGCGATGAGGAACTGTTTC**TAG**

**>TaDMH\_protein**

MPANKTYPSHKNANGEVDDEFYPLIRKYKDGRIERFMSSFPASEDPAAARGVVTRDVVIDQGTGVSRL  
FLPVQAAQAGTRLPLVVYVHGGSFCTESAFSRTYHRYATSLAASAGALIVSVEYRLAPEYPVPTSDDTWT  
AALRWVASLSDPWLAKYADPSRTFLAGDSAGNIVYHTAVRATRDDSIMDIQGLVMVHPFFWGPRLPAE  
KVLGDGAMFPPVWVDKLPFVTAGGAGNDDPRINPPDEEIALLTGRRVLVAIAEKDTLRDRGRQFVCSMR  
GCGWVDGSLTVVESEGEDHGFHLYAPLRATSKKLMKSIQVFINHRATLPSAMVIPGGSAAETMLGVPSRP  
FKDIFGYGMRMKRWSGTSFGLKVGRAKASTTSYGLRLKQARTFGDPVSAPTSVRFAMRNC\*

**>TaDMC**

**ATG**GCGGCTAACGTAGTGCAAGCCCTGGCCGCTGTCCTCACACTGCTGGTGATCACAAGAGCGCTATGGT  
ATCTGCTTTGGAGGCCATACGCTGTGGCCAGGTGGTTCGAGCAGCAGGGCATCAGAGGTCCGCCTTACAA  
ATTCTGCTTTGGGTCCTGCCCGACTGCCAAAGGATGCTCGTTGCCGGGAGAGTCAAGGATCTGGACACG  
AGCTCCCACGACTGCATCACCACCGTGCAACCTTCTTCCGGAAATGGGCCCTCACTGAAAAACATTCCTG  
TACTGGTTGGGACCGACACCAGCACTGTGTACTACAGACATAGAAAATAGTGAAGAAAGTGTAAAGCGACA  
GGACAGACATGTTCCAAAAAGATTACTTGAATCCCAGTTTGGAAAGCAATTCTAGGGAACGGGGTAATATT  
TGCAAACGGAGACGACTGGAAGCGGCCGCAAATTCATCCACCCGGCTTTCAGCCAAGAGAAGATCAAG  
TCCATGTCAGCAATAACGTTGGAGTGCACACAGCAGATGATGGAACAGTGGCGCACTCAAATGCAGGAGA  
GAACATGCAGCAAGCCGAGATCGACATGAGGTACGACTCCGATGACATAGCAATGCGTGTATAGCACGA  
GTGATGCTGGGCAAGAACTACAGGGAGGCCTGGGAAGTGTTCATGGCAGGAAGGGAGCAACTGAAGCTCG  
CCGCGTATGCATTTGCGGATCCTCCAGTACCTGGATTCAGGTACCTGCCGACACGTCGCAACCGTCGGAC  
CTGGCAACTCGACAAGCTTGTGAGAAGCAAGATTACAGAGATCATAAAGGCGCGGCTTGCTAGCAGTGTC  
TATGGAGACGACCTGCTCGGGCAGATGTTGTGGCTGCAGAGGTTCGGGTGCTGGCGCCAACGCCGAGAACC  
TGAGCACGGAGGAGATGGTTCGGCGAGTGCAGGACCTTCTTCATGGCTGGGTACGAAACCAGCGCCAACCT  
CATTACCTGGGCCATGTTCTGCTCGCCAGCCACCCACGGTGGCAGGAGATGGTCAGGGACGAGGTGCTC  
CAGGAGTTTCTGCTCACAAGCCACCCTTAGGTGACGGCTCGGCAAATTGAAGCTGCTCAACATGTTAC  
TCTGGGAGACATTGAGGCTCTATGGCCCATATCATTCCTGCAGAGGAAGACAGCCTCAGACACAATCCT  
CACACATGTGAAGGTGCCGAAAGGAACGATGATAACGATACCTCTGGTGATGTTGCACCGGGACAAAGAG  
GTCTGGGGACCCGACGCCGACAAGTTTAAACCAATGAGGTCCAGAATGGCTTCGCGAGAGCCGCCAAGC  
ATTCACATGCACTGCTGGCCTTCTCGTATGGGCTTAGGGTCTGTGTGCGGACAGAACTTGGCCATGGTGG  
GGTGCAGATCGTCATAGCGACGATGCTCAAAGTTTCTCCTTCTCCCTGTCCCCACTTATGTGCACAAG  
CCGAGCAATTCGTCACATTGACGCCCAAGTACGGGCTCCCTCTCATCGTGAGGAACCTGCAGCTGACTA  
GG**TGA**

**>TaDMC\_protein**

MAANVVQALAAVLTLLVITRALWYLLWRPYAVARWFEQQGIRGPPYKFLVGSPLDCQRMVLVAGRVDLDT  
SSHDCITTVQPFPRKWLKNI PVLVGTDTSTVYYRHRNSEESVKRQDRHVPKRLLESQFGSNSRERGN  
CKRRRLEAAPQIHPFQFPREDQVHVSNNVGVHTADDGTVAHSNAGENMQQAEIDMRYSDDDIAMRVIAR  
VMLGKNYREAVEVFMAGREQLKLAAYAFADPPVPFGRYLPTRNRRTWQLDKLVRSKITEIKARLASSV  
YGDDLLGQMLWLQSRGAGANAENLSTEEMVGE CRTFFMAGYETSANLITWAMFLLASHPRWQEMVRDEVV  
QEFPAHKPPLGDGLGKLLNMLLWETLRLYGPISFLQRKTASDTILTHVKVPKGTMITIPLVMLHRDKE  
VWGPDADKFNPMRFQNGFARAAKHSHALLAFSYGPRVCVGNFAMVEVQIIVIATMLKSFSFSLSPITYVHK  
PSNFVTLTPKYGLPLIVRNQLTR\*

**Zavitan genes:**

**Nucleotide and protein sequence of 22 annotated genes in the Zavitan *W1* physical map interval. Gene/protein nomenclature is similar to Figure 2C.**

**>NB-Arc-like\_1**

ATGGCGACGTTTCGTGATCCAGCACAAACACAGCACTAGCTAAGCAAGAGTCCGTGGTTAGCACTAATAAGC  
 AAGTCATATCACACGGGCCCTCCCCTGCATCCCTTCCCTGTATAAACGATTCTCCACGGCACAAACAGAA  
 TCATCAAACCAACACCAGGTACGCACACTACGCAGCACACACGTTAACCTCAGAGTCCCATTACATTGATG  
 GCTTCCCTGGCCCCGAAATACCGTGCGGCTCCTTGTCTGGTGGCGTCGTTCTGCAGCTGAGCTCCATCA  
 TGCCGGCCGCGGGCTGGCAGGATGCTTGCAGGGGACGTACTGAAGTGTGAAGGCGGGTTGGTATTCAA  
 GAGAGATCCCTCCATTAGCGGGCGGGCATGTGCGTTCGTAGCCGACATACTCAAGTGCGGCGGGGTTG  
 GTATTCAAGGAAGATCCCTCCGTTAGCGGGCGGGCAGTGCCTCGTAGCCAACGTACTCAAGTGCGGCG  
 CCGGGTTTCGAATTCGAAGGAAGATCCATCCATTAACGGCGGTGGCGGGTGCCTCGTAGCCGCCGTACTCA  
 GTGCGGGCGGGGTTTCAATTCAAGAAAGATCCCTCCATGAGCGGGCGGGCGGGATGCGTTCGTAGCCGCC  
 TTACTCAAGTGCGGTGTGGGTTTCAATTCAAGGAAGATCCCTCCATTCGCGGGCGGGCGGGAGTGTGTTG  
 TAACCAACGTAGTCAAGTGCAGCGGGGTTTCAATTCAAGAAAGACAACCCCCCTACCGGGCGGGCGGAA  
 GTTCCCATTAAATGGTGCATGCGTCTGTCGTCGTCGTTGATTGGCTATTTTCTTTGTTCTTCAATCC  
 TCTGTGTATGGTTTGTGATAACAGTGACTATTTTATTCAAGGCTGGGGCGCCCCCTCCCGTCGATCGC  
 TCAGCTATGCCATTGTTTCGTCTGAGCAGCTTGCAGTTCACCCCAAACACCTTGCAAAGTGTAGATCA  
 CCTCATGGCAATCGAGCCAATGATGGGCATGCAAAGGCCAATGTACTCCGTTTCATGCTAGCCAGGAG  
 GAAGCGGCAATGAAACAACGCTTTGCCGAGTACAAAGTAGATGTGCCACGGTTGTAGTCCGTGCTGTGA  
 TGAAGATTGGTTTCGATTTTAAATGTTGAAGCTGCTGGGGCTAGCATATATAAACTGTCTGATGAAGTTAC  
 TAATAGGAAAGAATTGCCCGTGAAGTCTATCAAATAAGTGAAGTACTGATAATGTCAGGAAGTGTATT  
 GGAAGATAGGCACGGTGTACGGCACGGACAAAGTTGCCAAGAGTTGTATTGGACAGGCCCGCAAACCTGG  
 CCTATCACGTGCAAGATTGGATCACTGTGTACAAACTTATACTGTTGAAGTGTGATGCCATTGGCAGG  
 AGGCACTGACAAAACGGACATGGAGCAAGAGGTATACTTCCATATACATGATGCTCTCCAGAATTTCCAA  
 GGAAGTTGCATCGTCAGCACGACATGGAACGAACATGTTGCAATGATTTCTTCTCCACCGGTGCGCTTC  
 GGCTCGAGCAGTTGAGTCAGCCTGATGCATTTGACCTTCTCTGCAGACGGGATTTTACAGAAAACAACGGC  
 TACATGTGCCCCGAGGAGCTTGAGGCAGTTGCGACCTCAAAGGCTGCTTTTGTACTCCAGTCTGTTCCCT  
 AAAGACCATCCCATGTCACGTGAGAGCCTGGTACGACTTTGGGTTTTCAGAAGGCCCTTGTGGTGAAGT  
 GCATGGACACAACAGAGATGCTAGCCGAGGAAAATATCAGGGAATTGGTCTGCCGCAATATGCTTGAAGT  
 TATGAAGAATGATGGGCTTGGCAGGGTCAAACCTGTGAGATGTGA

**>NB-Arc-like\_1\_protein**

MATFVIQHNTALAKQESVSVSTNKQVISHGPSASLPCINDSPRHQNHQTNTRYALRSTHVNLRVPIITLMASLARNT  
 VRLLVLVGVVLQLSSIMPAAAAGRMLAGDVLKCEGGLVFKRDPSISGGGMCVVADILKCGGGLVFKEDPSVSGGGEC  
 VVANVLKCGAGFEFKEDPSINGGGCVVAVLKCGAGFEFKKDPSSGGGGCVVAALLKCGAGFEFKEDPSIRGGGE  
 CVVTNVVKCDAGFEFKDNPPTGGGKFLPMVHASVVVVVDWLFPLFLQSSVYGLSITVTILFKAGAPPSRRSLSYAI  
 VSSEQLAVAPQTPCKSVDDLMAIEPMMGMQRPNVLRFMLAQEEAAMKQRFAYKVDVPTVVVRAVMKIGSILNVEAA  
 GASIYKLSDEVTRKELPVKVYQISEPLIMSGSVIGKIGTVYGTDKVAKSCIGQARKLAYHVEDWITVSQTYTVEVL  
 MPLAGGTDKTDMEQEVYFHIHDALQNFQGSIVSTTWNEHVAMISSPTGRLRLEQLSQPDAFDLLCRRDFTETTATC  
 APRSLRQLRPQRLLLYSSLFPKDHPMSRESLVRLWVSEGLVVSRRGMDTTEMLAEENIRELVCRNMLEVMKNDGLGRV  
 KTCEM\*

**>NB-Arc-like\_2**

ATGGCTTCCCTGGCCCCGAAATACCGTGCCTGCTCCTTGTCTGGTGGCGCTCGTTCTGCAGCTGAGCTCCATCATGCC  
 GGCCCGGGCGGCTGGCAGGATGCTTGCAGAGGACGTACTGAAGTGTGAAGGCGGGTTGGTATTCAAGAGAGATCCCT  
 CCATTAGCGGGCGGGCATGTGCGTTCGTAGCCGACATACTCAAGTGCGGTGGCGGGTTGGTATTCAAGGAAGATCCC  
 TCCGTTAGCGGGCGGGCAGTGCCTCGTAGCCAACGTACTCAAGTGCGGCGGGGTTTCAATTCAAGGAAGATCC

ATCCATTAATGGCGGTGGCGGGTGCCTCGTAGCCGCCATAGTCAAGTGCGGCGCCGGGTTTCAATTCAAGAAAGATC  
 CCTCCATAAGCGGGCGGGCGGATGCGTCTGAGCCGCTTACTCAAGTGCGGTGTGGGTTTCAATTCAAGGAAGAT  
 CCCTCCATTTCGCGGGCGGGCGGAGTGTGTTGTAACCAACGTAGTCAAGTGCAGCGCCGGGTTTCAATTCAAGAAAGA  
 CAACCCCCCTACCGGGCGGAGCAAGATAACAGTGACTATTTTTATTCAAGGCTGGGGCGCCCCCTCCCGTTCGATCGC  
 TCAGCTATGCCAATGTTTTGCTCTGAGCAGCTTGCAGTTGCACCCCAAACACCTTGCAAAAGTGTAGATCACCCCTCGT  
 GGCAATCCAGCCAATGATGGGCATGCAAAGGCCCAATATCATCCGTTTTATGCTAGCCCAGGAGGAAGCCGGATATC  
 ATGA

**>NB-Arc-like\_2\_protein**

MASLARNTVLLLLVLVGVVLQLSSIMPAAAAGRMLAEDVLKCEGGLVFKRDPSISGGGMCVVADILKCGGGLVFKEDP  
 SVSGGGECVVANVLKCGAGFEFKEDPSINGGGGCVVAAIVKCGAGFEFKDPSISGGGGCVVAALLKCGAGFEFKED  
 PSIRGGGECVVTNVKCDAGFEFKDNPPTGGSKITVTILFKAGAPSRRLSYANVSSEQLAVAPQTPCKSVDPHPR  
 GNPANDGHAKAQYHPFHASPGGSRIS\*

**>DUF4220**

ATGGCTGGAGTGGTGCCTATGGAACGAGTGGGAGGTCCAAATCCTAATGCTTGAAGCTTCATGCTGCAAGTGT  
 CCTGCTCCTATTCGAGGGAGGCGTCCGAGAACATCTCCGTCGTCACGACCCCTCCTATGGCTAGCATACCTCC  
 TGGCTGACTCCACAGTGATATACATACTCGGCCACATGTCAATTTGCAGCAAGTCCACGAGAAGCAACAGCTCATG  
 GCGTTCTGGGCGCCGTTCTTGTGTTGCATCTCGGTGGCCAGGATACCATCACCGCCTACTCCATAGAAGACAACCA  
 GCTGTGGCCGCGCCACCTGCTCTCTGTTGGTGCAGGCATTAGGAGTAGGTTATGTCTTCTACAAGTATGTGCTG  
 GTAGCTGGACCTTGTTACAGCCGAGCTCTGGTATTTGTGGCCGGTGTCTTAAGTATGGCGAGAGAGTATGGGCG  
 CTCAGGAACCTCAAGCTGGACAGCATCAGGAAGTTCCTTGATGAGGTTGAGAAGCCGAGGGTGGTGAAGGAGGCTGA  
 ACGAGAAGAAGAACGGCCCTACCCTCTGCCTGCACAGTGGGGCGAAGAGGATAAGTTAGATTCTGAAGAAGTACTGC  
 AGGGAGCACATGATCTATTACCCATTTGCATGGGTGAGTTTGTGCGATTATAAGTTCTTGCCGTCCTGGTTGCAGATT  
 CAAGCCAACCTGCCGATTCAAGCGCAAGGGGTGCTTGTATGAGCTGATCGAGATGCAGCTCTCCTTGATGCACGACGT  
 CCTGTACACCAAGGCGGGTGGTCTTACATGGTATGGATGCTCCATCCGTGCGATATCATTGGTTGCCACCATCA  
 GTGCTTTCTTCTTATTCAATCAAGCATTGGCAAGAATGACTTCAGCAGAGGTGATATCATTGTCACATATATCTTA  
 ATAGCTGGGGCTGTCTCCTAGAGATGACATCATTGTTGAAGGCAATGGGTTCAACATGGGCATGCACATTGTTGCG  
 TGCTAGAAGATGGGTTTCGCTTTCATAGCATGGTTCGATCTGTTTCGACAACATGTCAGGGCTGCGGAAAGAAATAGAA  
 GATGGTCAGGTTTTATTGGACAGCCCAGGCCGTCCTGTCATCGGACATGGACAGGACAGGGGTGGCTGGACCCGG  
 GAAGTTGCCAAGTGGTTTTGAATTGAAGCACTGCAAGATTTGTGGAAGAAGCTGCACCGCTCCTTACCTGTCATTTT  
 ATATGGTACTAAGGAGTTGGTGTGATGAGACATGTAACAAGAATGGTGGAGGAATGCCATGGCCAAGAGGATGTCATGA  
 GGAGTTACAGTGGTTCAGTGCAGCTGAGTGCATGGCAGGTAACCTTTGAGGATCCCACCTCGCGCGCTGGCATTGAT  
 TTTGATGACAAAATCCTTGCTGTTACTTTGCCACCAAAAATGTTCTTCCAATTTTACGTTGAACCAAGGCAGCTAGA  
 GCCAGTTGTGGAGGCAATCGATACGCTGTCCGAATACATGATATTCCTCCTTTTGAACGTCCTGATGCTGCCTA  
 GCCCTGTTTCGCCCCGTACCATATGCCAATGCTGAAGCAGCATATCAAAGCTTAATTTGCATTGTGTGGTGGGTTCC  
 TTTATTAAGCGCATCACAAGAATGGCGGAGCTGGACAAAAGAAGAGAGGAGCTGGAGAAAACAAAGAGGGATCGATG  
 GCATGCTAGAGAGCTGAAAAAATAAGGGAGGAGTTGGAAACAATAAGGGAGGAGGTGCAGGTGCTGGAGAGAGGAA  
 AGGAGAACCTGCTTTTCGGTACGTTTACATCCACCCGCTTAGTCCGTGGAGCCGAGATTGTTGAAAGGCTGATATAT  
 AATGATGCGCGGGACCTGGACAACATGGCGGTTCGGGACGGTACTGCTTGGGGTGTGGGTGGAGATGCTGTGCTACGC  
 GCGCACCACTGCAGCAGGGATTACACGCCAGGCAGCTCAACAATGGCGGTGAGTTTATTACCATTGTCTGGCTTT  
 TGTCAACTGCCATTTTCAATGGAACTACATCAGGTGA

**>DUF4220\_protein**

MAGVVRLWNEWEVQILMLASFMLQVFLLLFAGRRRQNI SVVPRTLLWLAYLLADSTVIYILGHMSICSKSHEKQQLM  
 AFWAPFLLVHLGGQDTITAYSIEDNQLWPRHLLSLVVQALGVGYVFYKYVAGSWTLFTAALVVFVAGVLKYGERVWA  
 LRNSKLD SIRKFLDEVEKPRVVKEAEREERPYPLPAQWGEEDKLDSEEVLQGAHLLPICMGQFVDYKFLPSRLQI  
 QANCRFKRKGCLYELIEMQLSLMHDVLYTKAAVFTWYGC SIRAI SLVATISAFFLFQSSIGKNDFSRGDI IVTYIL  
 IAGAVLLEMTSLKAMGSTWACTLLRARRVRLHSMVSVRVQHVRAAERNRRWSGFIGQPRPSTGIGHGQDRGWTR  
 EVAKVWELKHCKDLWKKLHRSRPVSYGTELVMRHVTRMVEECHGQEDVMRSYSQCALSRWQVTFEDPTSRAGID  
 FDDKILAWYFATKMMFFQFHVEPRQLEPVVEAIDTLESEYMI FLLLERPYMLPSPVPRPVYANAEEAYQKLNHLRCVGS  
 FIKRITRMAELDKRREELEKTKRDRWHARELKKIREELETIREEVQVLERGKENLLSVRLHPPALVRGAEIVERLIY  
 NDARDLDNMAVGTVLLGVWVEMLCYAAHCSRDSHARQLNNGGEFITIVWLLSTAI FNGNYIR\*

**>PKS-1.1**

ATGGCAGGCAGCTCACCGAAGGTTAGTGAGATCCGGTGTGCGCAGCGTGCGGAAGGCTCCGCGGCAATGCTGGCTAT  
 CGGAACAGCAAATCCGGCGAACAAGGTGTCCCAAGAAGAGTACCCTGACTATTATTTCCGCGTTACCAAGAGCGAGC  
 ACCTTACTGACCATAAAGACACATTCAAGATAATATGTGGTCTAACGGGCACGGAGAATCGTTTTCTTCTACCACACG  
 GATGAACTGCTCAACTCCCACCCTGTCTTGCTGGACAACACGTCACCGTCCCCTGAGGCTCGGCATGATATCGTGGC  
 CAAGGCTGCTCCAGAGCTTGCGGCAGCAGCAGCAAAGAAGGCCATCGCAAAGTGGGGCCGTCCGGCCAGTGACATCA  
 CCCACCTTATCGTCAGCACCAACTCTGACGCTGGCGCCCCAAGCGCTGACGTACGCTTGGTTTTCACTCCTTGGCCTT  
 CGCGCCGATGTCTGTCTGCTACCATGCTCCATCTTAACGGCTGCTTCGCCGGCTGCTCCGCTTTCGCCTAGCCAAGGA  
 CCTTGCTGAGAATAACTGTGGGGCACGCGTCTCTGCTAGCTTGCCTGGAGCTCGCCATTTCTGGCTTCTGCAGCCCCG  
 GCGAAGGGGACTGCTTAGACACCCTCATCACTCATGCGTTGTTTTGGTGATGGGGCAGGCGCGGTAATCGTCCGGCGCC  
 GACCCCATGCACCCCATCGAGAATCCTCTGTTTTGAGATGGTGTCCGTCTCTCAGACCCTCGTGCCGAGCACTGAGAA  
 TGTGCTCACCTGAACTTGGGGAGCAATGGCACTCATGGGAAAGTTTACACCAAAGTGGCCACACTGGTAGCAGACA  
 CCATGGAACCTTGTCTTCTGGAAGCGTTTGGTCCACTTGAGATGGACTTCCAATGGAATGACCTCTTCTGGGCAGTG  
 CACCCTGGCAGCCGTGGGATCTTGGACCAACTTGACAAGACACTCCAGTTGGAGCCCACGAAGCTAGCGGCGAGCAG  
 AACTGTCGTACAGAAGTTTGGGAACATGTTTAGCGCCACCCTGATCTTCGTGCTTGGATGAGCTACAGCGTCGAATGG  
 AGGAGGAAGGAGAGCAAGCTGAGTGGGGGGCCATGGTGGGATTTGGACCAGGCTTCACTATCGAGACCATGGTGTCT  
 CATGCAACCGGCGCTCTCAAGAAAAATTAG

**>PKS-1.1\_protein**

MAGSSPKVSEIRCAQRAEGSAAMLAIGTANPANKVSQEEYPDYYFRVTKSEHLTDHKDTFKIICGLTGTENRFFYHT  
 DELLNSHPVLLDNTSPSREARHDIVAKAAPELAAAAAKKAIKAWGRPASDITHLIVSTNSDAGAPSADVRLVSLGL  
 RADVCRMTLHLNGCFAGCSALRLAKDLAENNCGARVLVACVELAISGFCSPEGDCLDTLITHALFGDGAGAVIVGA  
 DPMHPIENPLFEMVSVSQTLPSTENVLTLNLGNSNGTHGKVYTKLPTLVADTMEPCLLEAFGPLEMDFQWNDLFWAV  
 HPGSRGILDQLDKTLQLEPTKLAASRTVVQKFGNMFATVIFVLDELQRRMEEEGEQA EWGAMVGFPGPFTIETMVL  
 HATGALKKN\*

**>PKS-1.2**

ATGGCAGGCAGCTCACCGAAGGTTAGTGAGATCCGGTGTGCGCAGCGTGCGGAAGGCTCCGCGGCAATGCTGGCTAT  
 CGGAACAGCAAATCCGGCGAACAAGGTGTCCCAAGAAGAGTACCCTGACTATTATTTCCGCGTTACCAAGAGCGAGC  
 ACCTTACTGACCATAAAGACACATTCAAGATAATATGTGGTCTAACGGGCACGGAGAATCGTTTTCTTCTACCACACG  
 GATGAACTGCTCAACTCCCACCCTGTCTTGCTGGACAACACGTCACCGTCCCCTGAGGCTCGGCATGATATCGTGGC  
 CAAGGCTGCTCCAGAGCTTGCGGCAGCAGCAGCAAAGAAGGCCATCGCAAAGTGGGGCCGTCCGGCCAGTGACATCA  
 CCCACCTTATCGTCAGCACCAACTCTGACGCTGGCGCCCCAAGCGCTGACGTACGCTTGGTTTTCACTCCTTGGCCTT  
 CGCGCCGATGTCTGTCTGCTACCATGCTCCATCTTAACGGCTGCTTCGCCGGCTGCTCCGCTTTCGCCTAGCCAAGGA  
 CCTTGCTGAGAATAACTGTGGGGCACGCGTCTCTGCTAGCTTGCCTGGAGCTCGCCATTTCTGGCTTCTGCAGCCCCG  
 GCGAAGGGGACTGCTTAGACACCCTCATCACTCATGCAATTGTTTTGGTGATGGGGCAGGCGCGGTAATCGTCCGGCGCC  
 GACCCCATGCACCCCATCGAGAATCCTCTGTTTTGAGATGGTGTCCGTCTCTCAGACCCTCGTGCCGAGCACTGAGAA  
 TGTGCTCACCTGAACTTGGGGAGCAATGGCACTCATGGGAAAGTTTACACCAAAGTGGCCACACTGGTAGCAGACA  
 CCATGGAACCTTGTCTTCTGGAAGCGTTTGGTCCACTTGAGATGGACTTCCAATGGAATGACCTCTTCTGGGCAGTG  
 CACCCTGGCAGCCGTGGGATCTTGGACCAACTTGACAAGACACTCCAGTTGGAGCCCACGAAGCTAGCGGCGAGCAG  
 AACTGTCGTACAGAAGTTTGGGAACATGTTTAGCGCCACCCTGATCTTCGTGCTTGGATGAGCTACAGCGTCGAATGG  
 AGGAGGAAGGAGAGCAAGCTGAGTGGGGGGCCATGGTGGGATTTGGACCAGGCTTCACTATCGAGACCATGGTGTCT  
 CATGCAACCGGCGCTCTCAAGAAAAATTAG

**>PKS-1.2\_protein**

MAGSSPKVSEIRCAQRAEGSAAMLAIGTANPANKVSQEEYPDYYFRVTKSEHLTDHKDTFKIICGLTGTENRFFYHT  
 DELLNSHPVLLDNTSPSREARHDIVAKAAPELAAAAAKKAIKAWGRPASDITHLIVSTNSDAGAPSADVRLVSLGL  
 RADVCRMTLHLNGCFAGCSALRLAKDLAENNCGARVLVACVELAISGFCSPEGDCLDTLITHALFGDGAGAVIVGA  
 DPMHPIENPLFEMVSVSQTLPSTENVLTLNLGNSNGTHGKVYTKLPTLVADTMEPCLLEAFGPLEMDFQWNDLFWAV  
 HPGSRGILDQLDKTLQLEPTKLAASRTVVQKFGNMFATVIFVLDELQRRMEEEGEQA EWGAMVGFPGPFTIETMVL  
 HATGALKKK\*

**>P450-1.1**

ATGGCGGCTAACGTAGTGCAAGCCCTGGCCGCTGTCCTCACACTGCTGGTGATCACAAGAGCGCTATGGTATCTGCT  
 TTGGAGGCCATACGCTGTGGCCAGGTGGTTTCGAGCAGCAGGGCATCAGAGGTCCGCCTTACAAATTCCTGGTTGGGT  
 CCCTGCCCCGACTGCCAAAGGATGCTCGTTGCCGGGAGAGTCAAGGATCTGGACACGAGCTCCCACGACTGCATCACC  
 ACCGTGCAACCCTTCTCCGGAAATGGGCCTCACTGTATGGAAAAACATTCCTGTACTGGTTGGGACCGACACCAGC  
 ACTGTGTACTACAGACATAGAAATAGTGAAGAAAGTGTTAAGCGACAGGACAGACATGTTCCAAAAAGATTACTTGA  
 ATCCCAGTTTTGGAAGCAATTCTAGGGAACGGGGTAATATTTGCAAACGGGAGACGACTGGAAGCGGGCCGCAAATTC  
 ATCCACCCGGCTTTTCAGCCAAGAGAAGATCAAGTCCATGTCTAGCAATAACGTTGGAGTGCACACAGCAGATGATGGA  
 ACAGTGGCGCACTCAAATGCAGGAGAGCAACATGCAGCAAGCCGAGATCGACATGAGGTACGACTCCGATGACATAG  
 CAATGCGTGTATAGCAGCAGTGTGCTGGGCAAGAACTACAGGGAGGCCTGGGAAGTGTTTCATGGCAGGAAGGGAG  
 CAACTGAAGCTCGCCGCGTATGCATTTGCGGATCCTCCAGTACCTGGATTTCAGGTACCTGCCGACACGTCGCAACCG  
 TCGGACCTGGCACTCGACAAGCTTGTGAGAAGCAAGATTACAGAGATCATAAAGCGCGGCTTGTAGCAGTGTCT  
 ATGGAGACGACCTGCTCGGGCAGATGTTGTGGCTGCAGAGGTCCGGTGTGGCGCCAACGCCGAGACCCTGAGCAGC  
 GAGGAGATGGTCCGGCAGTGCAGGACCTTCTTCATGGCTGGGTACGAAACCAGCGCCAACCTCATTACCTGGGCCAT  
 GTTCTGCTCGCCAGCCACCCACGGTGGCAGGAGATGGTACAGGGACGAGGTTCGTCAGGAGTTTTCTGCTCACAAGC  
 CACCCTTAGGTGACGGTCTCGGCAAATTTGAAGCTGCTCAACATGTTACTCTGGGAGACATTGAGGCTCTATGGCCCC  
 CTATCATTCTGCAGAGGAAGACAGCCTCAGACACAATCCTCACACATGTGAAGGTGCCGAAAGGAACGATGATAAC  
 GATACCTCTGGTGATGTTGCACCGGGACAAAGAGGTCTGGGGACCCGACGCCGACGAGTTTAAACCCAATGAGGTTCC  
 AGAATGGCTTCGCGAGAGCCGCCAAGCATTACATGCACTGCTGGCCTTCTCGTATGGGCCTAGGGTCTGTGTGGG  
 CAGAATTTGCCATGGTGGAGGTGCAGATCGTCATAGCGACGATGCTCAAAGTTTTCTCCTTCTCCCTGTCCCCAC  
 TTATGTGCACAAGCCGAGCAATTTCTGTCACATTGACGCCCAAGTACGGGCTCCCTCTCATCGTGAGGAACCTGCAGC  
 TGACTAGGTGA

### >P450-1.1\_protein

MAANVVQALAAVLTLVITRALWYLLWRPYAVARWFEQQGIRGPPYKFLVGSPLDCQRMLVAGRVKDLDTSSHDCIT  
 TVQPPFRKWSLYGKTFLYWLGPTPALCTTDIEIVKKVLSDRDMDYFQKDYLNPSLEAILGNQVIFANGDDWKRRRF  
 IHPAFSQEKIKSMSAITLECTQQMMEQWRTQMQESNMQQAEIDMRYDSDDIAMRVIARVMLGKNYREAWVEFMAGRE  
 QLKLAAYAFADPPVPGFRYLPTRRNRRTWQLDKLVRSKITEIIKARLASSVYGDDLLGQMLWLQRSAGANAETLST  
 EEMVGEERTFFMAGYETSANLITWAMFLLASHPRWQEMVRDEVVQEFPAHKPPLGDGLGKLLKLLNMLLWETLRLYGP  
 LSFLQRKTASDITLTHVKVPKGMTITPLVMLHRDKEVWGPDADEFNPMRFQNGFARAAKHSHALLAFSYGPRVCVG  
 QNFAMVEVQIVIATMLKSFSLSPYVHKPSNFVTLTPKYGLPLIVRNLQLTR\*

### >Hyd-1.1

ATGCCTGCAAACAAGACTTACCCCTCCCATAAAAATGCCAACGGTGAGGTGGACGACGAATTCTACCCATTAATCCG  
 CAAGTACAAGGACGGCCGGATCGAGCGGTTTCATGAGCTCATTCTGTCGGCGCTCGGAGGACCCGGCCGAGCCGTG  
 GTGTGGCGACGAGGGACGTCGTCGTCGACCAGGGCACCGGTGTGTCCGTGCGCCTGTTCTTCTGCCCAGGCTGCC  
 GAGGCCGGCACGAGGCTCCCCCTTGTGTGTACGTCCATGGTGGTTCTTCTGACGAGAGTGCCTTCTCCCGGAC  
 GTACCACCGTTACGCCACTTCCCTCGCCGCCAGCGCAGGGGCGCTCATCGTGTCCGTGGAGTACCGTCTGGCGCCGG  
 AATATCCCGTCCCGACGTCCTACGATGACACATGGGCCGCGCTGCGGTGGGTGGCGTCTTGTCCGACCCTTGGCTC  
 GCCAAATACACAGACCTTAGCCGCAGTTCCTCGCCGGCGACAGCGCTGGCGGCAACATCGTGTACCACAGCGCCGT  
 GCGGCCACACATGATGACAGCATCATGGACATCCAGGGGTTGGTCATGGTGCATCCATTCTTCTGGGGGCCCGAGC  
 GTCTCCCGCGGAGAAGGTTGGACGGCGACGCATGTTCCACCAGTGTGGGTGGATAAGCTGTGGCCGTTCTGTG  
 ACGGCGGGCGGGGCTGGCAACGATGATCCTCGGATCAATCCTCCGGACGAGGAGATCGCGTTGCTAACTGGCAGGCG  
 GGTGCTTGTGGCCGTTGCAGAGAAGGACACCCTGCGCGACCGGGGGCGCCAGTTTGTGTGCAGCATGCGCAGGTGTG  
 GGTGGGTTGATGGCAGCCTCACCCTGGTGGAGTCCGAGGGTGAGGACCATGGCTTCCACTTGTACGCCCCCTACGT  
 GCGACCAGCAAGAAGCTTATGAAGAGCATGGTGCAGTTCATAAACCATCGCGCCACCTTGCCGTACCCGGCCATGGT  
 GATCCCAGAAGGCTCGGCCGAAACTATGCTAGGCGTCCCTAGTAGGCCATTTAAGGACATATTTGGCTACGGGATGC  
 GCATGAAACGTTGGAGTGGCAGGATTTTGGGCTCAAAGTTGGTCTGCAAAAGCATCGACGACGAGCTATGGGTTA  
 CCTTTGAAGCAAGCTCGCACCTTCGGAGACCCTGTTTCAGCACCAACTTCGGTAAGATTCTGTGATGAGGAACCTGTTT  
 CTAG

### >Hyd-1.1\_protein

MPANKTYPSHKNANGEVDDDEFYPLIRKYKDGRIFRMSFVPAEDPAASRGVATRDVVVDQGTGVSVRLFLPAQAA  
 EAGTRLPLVVYVHGGSFCTESAFSRTYHRYATSLAASAGALIVSVEYRLAPEYVPVPTSYYDDTWAALRWVASLSDPWL  
 AKYTDPSRTFLAGDSAGGNIVYHTAVRATHDSDIMDIQGLVMVHPFFWGPRLPAEKVLDGDAMFPVWVDKLPWFV  
 TAGGAGNDDPRINPPDEEIALLTGRRVLVAVAEKDTLRDRGRQFVCSMRRCGWVDGSLTVVESEGEDHGFHLYAPLR



ATSKKLMKSMVQFINHRATLPSAMVI PEGSAETMLGVPSRPFKDI FGYGMRMKRWSGTSFGLKVGRAKASTTSYGL  
 PLKQARTFGDPVSAPTSVRFVMRNCF\*

### >Hyd-1.2 (pseudogene)

ATGCCTGCAAACAAGACTTACCCCTCCCATAAAAATGCCAACGGTGAGGTGGACGACGAATTCTACCCATTAATCCG  
 CAAGTACAAGGACGGCCGGATCGAGCGGTTTCATGAGCTCATTCTGTGCCGGCGTCCGAGGACCCGGCCGAGCCGTG  
 GTGTGGCGACGAGGGACGTCGTCGTCGACCAGGGCACCGGTGTGTCCGTGCGCCTGTTCTTCTGCCAGGCTGCC  
 GAGGCCGGCACGAGGCTCCCCCTTGTGTGTACGTCCATGGTGGTTCCTTCTGCACGGAGAGTGCCTTCTCCCGGAC  
 GTACCACCGTTACGCCACTTCCCTCGCCGCCAGCGCAGGGGCGCTCATCGTGTCCGTGGAGTACCGTCTGGCGCCGG  
 AATATCCGGTCCCAACGTCTACGATGACACATGGGCCGCGCTGCGGTGGGTGGCGTCTTGTCCGACCCCTTGGCTC  
 GCCAAATACACAGACCCTAGCCGCACGTTCCCTCGCCGGCGACAGCGCTGGCGGCAACATCGTGTACCACACGGCCGT  
 GCGCGCCACACATGATGACAGCATCATGGACATCCAGGGGTTGGTCATGGTGCATCCATTCTTCTGGGGGCCGAGC  
 GTCTCCCGGGGAGAAGGTCTTGGACGGCGACCCATGTTCCACCAGTGTGGGTGGATAAGCTGTGGCCGTTTCGTG  
 ACGGCGGGCGGGGCTGGCAACGATGATCCTCGGATCAATCCTCCGGACGAGGAGATCGCGTTGCTAACTGGCAGGCG  
 GGTGCTTGTGGCCGTTGCAGAGAAGGACACCCTGCGCGACCGGGGGCGCCAGTTTGTGTGCAGCATGCGCAGGTGTG  
 GGTGGGTTGATGGCAGCCTCACCGTGGTGGAGTCCGAGGGTGGAGACCATGGCTTCCACTTGTACGCCCCCTACGTG  
 CGACCAGCAAGAAGCTTATGAAGAGCATCGTGCAGTTCATAAACCATCGCGCCACCTTGCCGTCACCGGCCATGGTG  
 ATCCCAAGAGGCTCGGCCGAAACTATGCTAGGCGTCCCTAGTAGGCCATTTAAGGACATATTTGGCTACGGGATGCG  
 CATGAAACGTTGGAGTGGCAGGATTTTGGGCTCAAAGTTGGTTCGTGCAAAGCATCGACGACGAGCTATGTGTTAC  
 CTTTGAAGCAAGCTCGCACCTTCGGAGACCCTGTTTCAGCACCAACTTCGGTAAGATTTCGTGATGAGGAACCTGTTTC  
 TAG

### >Hyd-1.2 (pseudogene)\_protein

MPANKTYPSHKNANGEVDDEFYPLIRKYKDGRIERFMSSFPASEDPAASRGVATRDVVVDQGTGVSVRLFLPAQAA  
 EAGTRLPLVVYVHGGSFCTESAFSRTYHRYATSLAASAGALIVSVEYRLAPEYVPVPTSYYDDTWAALRWVASLSDPWL  
 AKYTDPSRTFLAGDSAGGNIVYHTAVRATHDDSIMDIQGLVMVHPFFWGPRLPAEKVLDGDAMFPPVWVDKLPWFV  
 TAGGAGNDDPRINPPDEEIALLTGRRVLVAVAEKDTLRDRGRQFVCSMRRCGWVDGSLTVVESEGEDHGFHLYAPYV  
 RPARSL\*

### >HlyIII-1.1

ATGGGGAACGGCGGGCGTCCATGCCGATCAAGCTGTTGCATTGAAAAACAAAGGCAGCCCCACCTGCAGTGACGT  
 GGCGAAGCCGAGCTGCAAGCATAGGTACGAGCTCGTCTGCTACGATGCGCTCCCGCCCTTCTTGAAGCACGACGAAT  
 TCATCCTCGATCACTACCGCAGCGAATGGCCCGTCAAGCAGGCGATCCTCAGCGCCTTCGCCCTCCACAACGAGACG  
 ATCAACGTCTGGACGATTTGATCGGCTTCTTCATCTTCTCGCGCTCACCATGTCCGTCTGGTCCGGGGAGCACGG  
 CCCGGTACGCGGTGGCCGTTCTACACGTACCTGTGCGGCGCCATGTTCTGCCTGCTGATGAGCAGCGGTTGCCATC  
 TGCTGGCGTGCCACTCGGAGCATGCCACCTACGTGCTGCTCCGGCTCGACTACGCCGGCATACCGGCCTTATCGTC  
 ACCTCCTTCTACCCGGTCTGCTACTACACCTTCTCTGTGACCCCTTCTCCCGTACACTCTACCTTGGCTCCATCAC  
 CATCTGCGGCGCGGCCGCTGTGGCTGTCTCGCTGCTGCCGGTCTTCCAGGCACCTGATCTGCGGTGGGCGCGCGCTG  
 CGCTATTTCGCGTGCATGGGCGCGTCCGGCATCGTGCCCATCGTGACAAGATGCTCATGTTCCATGCACGACCCGAG  
 GCGGTGCTCACGACTGGTTACGAGGTGGTCATGGGGCGTCTTACCTTCCCGCGTGTGGTTTACGCCACAAGGAT  
 GCCGGAGAGGTTTATGCCAGGAATGTTTACCTCGTCCGGCATAGCCACCAGCTGTTCCACGTGCTAGTCATTGCCG  
 GCGCTTACGCGCACTACCATGCTGGCCTGGTTTACTTGAGTTGGCGGGACAGGGACCAATGCTGA

### >HlyIII-1.1\_protein

MGNNGGVHADQAVALKNKGSPTCSDVAKPSCKHRYELVCYDALPAFLKHDEFILDHYRSEWPVKQAILSALHNET  
 INVWTHLIGFFIFLALTMVSVSSEHGPVTRWPFYTYLFCGAMFLLMSSGCHLLACHSEHATYVLLRLDYAGITGLIV  
 TSFYPPVYYTFLCDPFSRTLYLGSITICGAAAVAVSLLPVFQAPDLRWARAALFACMGASGIVPIVHKMLMFHARPE  
 AVLTTGYEVVMGAFYLAGVLVYATRMPERFMPGMFDLVGHSHQLFHVLVVIAGAYAHYHAGLVYLSWRDRDQC\*

### >P450-1.2 (pseudogene)

ATGGCGGCTAACGTAGTGCAAGCCCTGGCCGCTGTCCTCACACTGCTGGTGATCACAAGAGCGCTATGGTATCTGCT  
 TTGGAGGCCATACGCTGTGGCCAGGTGGTTCGAGCAGCAGGGCATCAGAGGTCCGCCTTACAAATTCCTGGTTGGGT  
 CCCTGCCCGACTGCCAAAGGATGCTCGTTGCCGGGAGAGTCAAGGATCTGGACACGAGCTCCCACGACTGCATCACC

ACCGTGCAACCCTTCTTCCGGAAATGGGCCTCACTGTATGGAAAAACATTCTGTACTGGTTGGGACCGACACCAGC  
 ACTGTGTACTACAGACATAGAAATAGTGAAGAAAGTGTTAAGCGACAGGACAGACATGTTCCAAAAAGATTACTTGA  
 ATCCCAGTTTTGGAAGCAATTCTAGGGAACGGGGTAATATTTGCAAACGGGAGACGACTGGAAGCGGCGCCGCAAATTC  
 ATCCACCCGGCTTTTCAGCCAAGAGAAGATCAAGTCCATGTGAGCAATAACGTTGGAGTGCACACAGCAGATGATGGA  
 ACAGTGGCGCACTCAAATGCAGGAGAGCAACATGCAGCAAGCCGAGATCGACATGAGGTACGACTCCGATGACATAG  
 CAATGCGTGTATAGCAGGATGATGCTGGCAAGAACTACAGGGAGGCCTGGGAAGTGTTCATGGCAGGAAGGGAGC  
 GACTGAAGCTCGCCGCGTATGCATTTGCGGATCCTCCAGTACCTGGATTACAGGTACCTGCCGACACGTCGCAACCCT  
 CGGACCTGGCAACTCGACAAGCTTGTGAGAAGCAAGATTACAGAGATCATAAAGGCGCGGCTTGCTAGCAGTGTCTA  
 TGGAGACGACCTGCTCGGGCAGATGTTGTGGCTGCAGAGGTGGGTGCTGGCGCCAACGCCGAGACCCTGAGCACGG  
 AGGAGATGGTCGGCGAGTGCAGGACCTTCTTCATGGCTGGGTACGAAACCAGCGCCAACCTCATTACCTGGGCCATC  
 TTCCTGCTCGCCAGCACCACCGGTGGCAGGAGATGGTCAGGAGCAGGTTCGTCAGGAGTTCCTGCTCACAAGCC  
 ACCCTTAGGTGACGGTCTCGGCAAAATGAAGCTGCTCAACATGTTACTCTGGGAGACATTGAGGCTCTATGCCCC  
 TATCATTCTGCAGAGGAAGACAGCCTCAGACACAATCCTCACACATGTGAAGGTGCCGAAAGGAACGATGATAACG  
 ATACCTCTGGTGTGTTGCACCCGGACAAAGAGGTCTGGGGACCCGACGCCGACGAGTTTAACCCAATGAGGTTCCA  
 GAATGGCTTTCGCGAGAGCCGCCAAGCATTACATGCACTGCTGGCCTTCTCGTATGGGCCTAGGGTCTGTGTGGGC  
 AGAAGTTTGGCATGGTGGAGGTGCAGATCGTCATAGCGACGATGCTCAAAGTTTCTCCTTCTCCCTGTCCCCAGT  
 TATGTGCACAAGCCGAGGAATTTCTGTACATTGACGCCAAGTACGGGCTCCCTCTCATCGTGAGGAACCTGCAGCT  
 GACTAGGTGA

**>P450-1.2 (pseudogene)\_protein**

MAANVVQALAAVLTLLVITRALWYLLWRPYAVARWFEQQGIRGPPYKFLVGSPLDCQRMLVAGRVKDLDTSSHCIT  
 TVQPFRRKASLYGKTFLYWLGPTPALCTTDIEIVKKVLSDRDMDFKDYLNPSLEAILGNGVIFANGDDWKRRRKF  
 IHPAFSQEKIKSMSAITLECTQQMMEQWRTQMQESNMQQAIEDMRYDSDDIAMRVIARVMLARTTGRPGKCSWQEGS  
 D\*

**>Hyd-1.3**

ATGCCTGCAAACAAGACTTACCCCTCCCATAAAAAATGCCAACGGTGAGGTGGACGACGAATTCTACCCATTAATCCG  
 CAAGTACAAGGACGGCCGGATCGAGCGGTTTCATGAGCTCATTTCGTGCCGGCGTCAGAGGACCCGGCCGAGCCGTG  
 GTGTGGCGACGAGGGACGTCGTCGTCGACCAGGGCACCAGGTGTGTCCGTGCGCCTGTTCTTCTGCCAGGCTGCC  
 GAGGCCGGCAGGAGCTCCCCCTTGTGTGTACGTCCATGGTGGTTCCTTCTGCACGGAGAGTGCCTTCTCCCGGAC  
 GTACCACCGTTACGCCACTTCCCTCGCCGCCAGCGCAGGGGCGCTCATCGTGTCCGTGGAGTACCGTCTGGCGCCGG  
 AATATCCCGTGCCGACGTCCTACGATGACACATGGGCCGCGCTGCGGTGGGTGGCGTCTTGTCCGACCCCTGGCTC  
 GCCAAATACGCAGACCCTAGCCGCACGTTCCCTCGCCGGCGACAGCGCTGGCGGCAACATCGTGTACCACACGGCCGT  
 GCGCGCCACACATGATGACAGCATCATGGACATCCAGGGGTTGGTCATGGTGCATCCATTCTTCTGGGGGCCCCGAGC  
 GTCTCCCGGGCGGAGAAGGTCTTGGACGGCGACGCCATGTTCCACCAGTGTGGGTGGATAAGCTGTGGCCGTTTCGTG  
 ACGGCGGGCGGGGCTGGCAACGATGATCCTCGGATCAATCCTCCGGACGAGGAGATCGCGTGTACTAAGTGGCAGGCG  
 GGTGCTTGTGGCCGTTGCAGAGAAGGACACCCTGCGCGACCCGGGGGCGCCAGTTTGTGTGCAGCATGCGCAGGTGTG  
 GGTGGGTTGATGGCAGCCTCACCGTGGTGGAGTGGAGGGTGGAGACCATGGCTTCCACTTGTACGCCCCCTACGT  
 GCGACCAGCAAGAAGCTTATGAAGAGCATCGTGCAGTTCATAAACCATCGCGCCACCTTGCCTGACCCGGCATGGT  
 GATCCCAGAAGGCTCGGCCGAAACTATGCTAGGCGTCCCTAGTAGGCCATTTAAGGACATATTTGGCTACGGGATGC  
 GCATGAAACGTTGGAGTGGCAGCAGTTTTTGGGCTCAAAGTTGGTTCGTGCAAAAAGCATCGACGACGACTATGGGTTA  
 CCTTTGAAGCAAGCTCGCACCTTCCGAGACCCTGTTTCAGCACCAACTTCGGTAAGATTTCGTGATGAGGAACCTGTTT  
 CTAG

**>Hyd-1.3\_protein**

MPANKTYPSHKNANGEVDDEFYPLIRKYKDGRIERFMSSFPASEDPAASRGVATRDRVVDQGTGVSVRLFLPAQAA  
 EAGTRLPLVVYVHGGSFCTESAFSRTYHRYATSLAASAGALIVSVEYRLAPEYVPVTSYDDTWAALRWVASLSDPWL  
 AKYADPSRTFLAGDSAGGNIVYHTAVRATHDSDIMDIQGLVMVHPFFWGPRLPAEKVLDGDAMFPVWVDKLPWFV  
 TAGGAGNDDPRINPPDEEIALLTGRRVLVAEAKDTLRDRGRQFVCSMRRCGWVDGSLTVVESEGEDHGFHLYAPLR  
 ATSKKLMKSIQFINHRATLPSAMVIPEGSAETMLGVPSRPFKIDIFGYGMRMKRWSGTSFGLKVGRAKASTTSYGL  
 PLKQARTFGDPVSAPTSVRFRVNRNCF\*

**>HlyIII-1.2 (partial)**

GCGGCGTCCATGCCGATCAAGCTGTTGCATTGAAAAACAAAGGCAGCCCCACCTGCAGTGACGTGGCGAAGCCGAGC  
 TGCAAGCATAGGTACGAGCTCGTCTGCTACGACGCGCTCCCGCCTTCTTGAAGCACGACGAATTCATCCTCGATCA  
 CTACCGCAGCGAATGGCCCGTCAAGCAGGCGATCCTCAGCGCCTTCGCCCTCCACAACGAGACGATCAACGTCTGGA

CGCATTGATCGGCTTCTTCATCTTCTCGCGCTCACCATGTCCGTCTGGTCGGGGGAGCACGGCCCGGTACGCGG  
 TGGCCGTTCTACACGTACCTGTGCGGGGCCATGTTCTGCCTGCTGATGAGCAGCGGTTGCCATCTGCTGGCGTGCCA  
 CTCGGAGCATGCCACCTACGTGCTGCTCCGGCTCGACTACGCCGGCATCACCGGCCTTATCGTCACCTCCTTCTACC  
 CGGTCGTCTACTACACCTTCTCTGTGACCCCTTCTCCCGTACACTCTACCTTGGCTCCATCACCATCTGCGGCGCG  
 GCCGCTGTGGCTGTCTCGCTGCTGCCGGTCTTCCAGGCACCTGATCTGCGGTGGGCGCGCGCTGCGCTATTGCGGTG  
 CATGGGCGCGTCCGGCATCGTGCCCATCGTGACAAGATGCTCATGTTCCATTACGACCCGAGGCGGTGCTCACGA  
 CTGGTTACGAGGTGGTCATCGGGGCGTCTACCTTGGCGGCGTGTGGTTTACGCCACAAGGGTGCCGGAGAGGTTT  
 ATGCCAGGAATGTTTGACCTCGTCGGGCATAGCCACCAGCTGTTCCACGTGCTAGTCATTGCCGGCGCTTACGCGCA  
 CTACCATGCTGGCCTGGTTTACTTGAGTTGGCGGGACAGGGACCAGTGC**TGA**

**>HlyIII-1.2 (partial\_protein)**

GVHADQAVALKNKGSPTECDVAKPCKHRYELVCYDALPAFLKHDEFILDHYRSEWPVKQAILSALFHNETINVVT  
 HLIIGFFIFLALTMVSVSGEHPVTRWPFYTYLCGAMFLLMSSGCHLLACHSEHATYVLLRLDYAGITGLIVTSFYF  
 VVYYTFLCDPFSRSLYLGSIITICGAAAVAVSLLPVFQAPDLRWARAALFACMGASGIVPIVHKMLMFHSRPEAVLTT  
 GYEVVIGAFYLAGVLVYATRVPERFMPGFMFDLVGSHQLFHVLVVIAGAYAHYHAGLVYLSWRDRDQC\*

**>PKS-2.1**

**ATG**ACAGGCAGCTCACCGAAAGTTAGTGAGATCCGGGGCGCGCAGCGTGCGGAAGGCTGCGCAGCCATGTTGGCTAT  
 TGGAACAGCAAATCCTGCGAACCAGGTGTCCCAAGAAGAGTACCCTTACTACTATTTCCGTGTCACAAAGTGCGAGC  
 ACCTTACTGACCATAAAGACACATTCAAGATAATATGTGGTCTCACGGGCACGGAGAACCCTTCTTCTACCACACG  
 GATGAAGTGTCAACTCCCACCCTGTCTTGTGGACCACACATCGCCGTCGCGGAAGCTCGGCATGATATCGTTCGC  
 CAAGGCTGTCCAGGGCTTGGCGCATCAGCAGCAAGAAGGCCATCGCAAAGTGGGGCCGTCGGCCACTGACATCA  
 CCCACCTTATCGCCAGCACCAACTCTGACGCCGGCGCCCAAGTGCAGGATGTACGCTTGGTTTCACTCCTTGGCCTT  
 CGCGCCAACGTGTGCCGTACGATGCTCCATCTTAATGGCTGCTTCGCTGGCTGCTCCGCCTTGCCTTAGCCAAGGA  
 CCTTGCTGAGAACAACCGTGGGGCACGCGTCTCGTGGTTTGCCTGGAGCTCGCCATTTCTGGCTTCTGCAGCACCG  
 GCGAAGGGAAGTGTAGACACCCTCATTACTCATGCGTGTGGTGGTGGTGGTGGTGGTGGTGGTGGTGGTGGTGGT  
 GATCCCATACACCCCGTTGAGAATCCTCTGTTTGGATGGTGTCCGTCTCTCAGACCTTTCGTGCCGAGCACCGAGCA  
 TGTGCTCACCCCTGAAGTTGGGGAGCCACGGCACTCATGGCAAAGTTTACACCAAAGTGGCCACACTGGTAGCAGACA  
 CCATGGAACCTTGTCTTTTGAAGCATTGGTTCGACTTGGATGGACTTCAAATGGAATGACCTGTTCTGGGCTGTG  
 CACCCGGGCGAGCCGTGGGATCTTGGACCAGCTTGGACAAGACCCTCCAGTTGGATCCACGAAGCTAGCGGCGAGCCG  
 AACTGTCTGACAAAAGTTTGGGAACATGTTTGGTGCACCGTAATCTTCGTGCTTGGACAAGCTGCGCCGGCGAATGG  
 AGGAGGAAGGAGAGCGAGCAGAGTGGGGGGCAATGGTAGCATTGGACCAGGTTTCACTATCGAGACCATGGTGTCT  
 CACGCAACTAGTGCTCTGAAGGAAAAT**TAG**

**>PKS-2.1\_protein**

MTGSSPKVSEIRGAQRAEGCAAMLAIGTANPANQVSQEEYPYYYYFRVTKCEHLTDHKDTFKIICGLTGTENRFFYHT  
 DELLNSHPVLLDHTSPSREARHDIVAKAAPGLAASAANKAIKAWGRPATDITHLIASTNSDAGAPSADVRLVSLLLGL  
 RANVCRMLHLNGCFAGCSALRLAKDLAENNRGARVLVVCVELAISGFCSTGEGNCLDTLITHALFGDGAGAVIVGA  
 DPIHPVENPLFEMVSVSQTFVPSTEHVLTLLNLGSHGTHGKVVYTKLPTLVADTMEPCLSEAFGRLEMDFKWNDFWAV  
 HPGSRGILDQLDKTLQLDPTKLAASRTVVQKFGNMFSAIVFVLDKLRRRMEEEGERAEWGAMVAFGPGFTIETMVL  
 HATSALKEN\*

**>P450-2.1**

**ATG**GAGCTTAACGTAGTGCAAGCCATGGCAGCTGTCCCTCATGGTGTAGTAACCACGAGAGCGCTATGGTATCTGCT  
 TTGGAGGCCGTATGCCGTGGCCAGGTGGTTCGACGGCAGGGCATCAGAGGTCCGCCTTACAATCTCCTGGTTGGGT  
 CCCTGCCGGAGTGCCAGAAGATGATTGTGCGCGGGAGAGCCAAGGATCTGGACACCATCTCCACGACTGCATCACT  
 ACCGTGCAACCCTTCTTCCAGAAATGGGCCTCCATGTATGGGAAAACATTCCTATACTGGCTGGGGCCGACACCAGC  
 ACTGTGCTCTACGGACATGGAGCTGGTGAAGAAAGTGTAAACCGACAGGACGGACATGTTCCAAAAGACTACTCAA  
 ATCCTAGCCTGGAAGCGTCTGGGGAATGGGGTGTATTTGCAAACGGACACGACTGGAAGCGGCGAGCAAAATTC  
 ATCCACCCGGCTTTCAACCAAGAGAAGATCAAGTCCATGTGACAAATAACGTTGGAGTGCACACAGCAGACAATGGA  
 ACGGTGGCGCAACAGGCAGCAAGCCGAGATAGACATGATGCACGACTCCGACGAGATAGCCATGAGTGTCAATGCGA  
 GAGTGATGTTGGCAAGTGCTACAAGGAGCCTGGGAGGTGTTTCATCGCCGAAAGGAGCAGCTGAAGCTAGCTACT  
 TATGCGTTTTGCGGATCCTCCGGTACCTGGATTATGGTACCTGCCAACACGTCGCAACCGTCCGGGCATGGTATCTTGA  
 CAAGCTTGTGAAACATAAGATCTCACAGATCATAGAGGCGCGACTCGCTAGCGGCGTCTACGAAGATGACCTGCTCG  
 GGCAGATGCTGCAGCTGCAGCTGCAAACATGTAGCAGCGGCAGCACCGAGACCCTGAGCACCGAGGAGATGGTTGGC  
 GAGTGCAGGACTTTCTTCGCGGCTGGGTACGAAACCAGTGCCAGCCTCATTACCTGGGCGATGTTCTGCTCGCCAG

CTACCCACGGTGGCAGGAGATGGTCAGGGAGGAGGTCGTCGGGAATATCCTGCTCACC GGTTACCCATAGGTGACG  
CCCTCGGCAAGTTGAAGCTGGTATGCTACGCACGTACATACTCCACCTTCTAAATTATATATGGTGCATATAA

**>P450-2.1\_protein**

MELNVVQAMA AAVLMVLVTTRALWYLLWRPYAVARWFRROGIRGPPYNLLVGS LPECQKMIVAGRAKDLDTI SHDCIT  
TVQPPFFQKWASMYGKTFLYWLGPTPALCSTDMELVKKVLTDRDMD FQKDYSNPSLEAVLGNVVFANGHDWKRRKF  
IHPAFNQEKIKSMSAITLECTQQTMERWRNRQQA EIDMMHDSDEIAMSVIARVMLGKCYKEAWEVFIAGKEQLK LAT  
YAFADPPVPGLWYLPTRRNRRRAWYLDKLVKHKI SQIIEARLASGVYEDDLLGQMLQLQLQTCSSGSETLSTEEMVG  
ECRTFFAAGYETSASLITWAMFLLASYPRWQEMVREEVVREYPAHRLPIGDALGKLLKLV CYARTYSHLLNYI WCI\*

**>P450-3.1**

ATGTC AATTCTGTTCTCCCAAGAGCTGCCCATCTACACAGCACTCGTGCTACTTGTTC CCCTGTACTGCCTGTACTC  
AAGGGTTATATGTAGATCAGGGAACCCAGCACTCGTGCTCCCCACAAACTGGCCAATATTGCACATGTTTCCTTCCT  
TCTTGGCCAACCTCCACA ACTTGCACGAGTATTTAACCTTGTCTTGGCCGATCAGGGCACA ACTTCAGGGCGCAT  
GGCCACCCGGGACCGGGTTCGGGTTCTTTGTACATGCGACCCTACAAATGTCCGACACATTTT CACGACCAACTA  
CACCAACTTCCCAAAGGGCGCGGAGTTTGCCGATATCTTTGACATCGTGGGTGGCAGCCTCTTTACCATCGACGGTG  
AGCCGTCTCATCAACAGCGCGCAAAAGTCAAGGGCGCGCTCAGCAAACCGCGGATGGCTGCCACTATGGCGGCCTGC  
TGCTGTGACAAGGTGGAGAACGGCCTCCTCCCGTTTTTTAGGCGAATGGCGAGCACTGGCACTCCATTTGACGTGCA  
AGA ACTGATGTCAAGGTTTATGTTTGACCTGGCTGCTATGCCTTTCTTTGGCGTGGATCCTGGCCTCCTGTCTCG  
AAATGCTACAAGACAGGCTGCACATGGACGCTGCGGTTGCCCTTGACACGTTTCATGGAGGTGGGATTTTCCCTGTCT  
ATGACACCAAGTCTTATTGGAAGTTGATGAGGTGGCTAAACATTGGCCCTGAGAGAAAGCTCAAAGTGGCGCGCAC  
GGTGCTACGGGAGTTTCGCCGCGGAGATGATGGAGAGGAGGAAGATGAATACGTGTTTTGTTGGTAATGAAGATGAAC  
AAGAGGATGGGGATATCTTGCTTCTCCTCAATGACCCAGACTACGCCGATGATGACTTGCTCCGTGCGATGATC  
ATTGGCTACATGTTGCTGCTAGGGATACAGTTGGAACAACCCTGACATGGATCTTCTACAAACTCGCC CAGAACC  
TAACATTGTTTTCGAATATCCGAAAAGAACTCTCACCCATTGCATCACGCAAAGAAGCGGTTGGTGTGGATGCCATGT  
TGATCTTTGAGCCAAAAGAGACCAGATCTCTAGTATATTTGAAAGCCGTCCTGTACGAGACTCTCAGGCTATACCCA  
GCAGCGCCTCTTGAGTGCAAGACAGTAGTCGCCGATGATATCATGCCAAGTGGACATGAGGTTTCATGCCGGCGACAC  
CATTATTATTTCTATACACTCCATGGGGAGAATGGAGGGTGTGTGGGGTGAAGATTGCCTCCATTATAAACCAGATA  
GGTGGCTCTTGGTGGGTGGCAATAACATGAGGTATGTACCATCTCACAAATCTTGGCCTTCAACTCAGGCCCGAGG  
ATGTGCCTCGGCAAGGACATCGCAATTATGCAGATGAAGACAGTCATCGCATCAACGCTATGGA ACTTCGATGTGGA  
GGTGATGGACGGGCAACAATCCAGCCCAAGCAAGCTTGTATACAGCAGATGAAAAATGGGCTCATAGTTAAGCTAA  
AGAAGCGGGAAATGTA

**>P450-3.1\_protein**

MSILFSQELPIY TALVLLVPLYCLYSRVICRSGNPALVLP TNWPI LHMFP SFLANLHNLHEYLT LVL LAGSGHNFRAH  
GPPGTGLRFFVTC DPTNVRHIFTTNYTNFPKGA EFADIFDIVGGS LFTIDGEP SHQQR AKVKGALSKPRMAATMAAC  
CCDKVENGLLPFFRRMASTGTPFDVQELMSRFMFDLAAMPFFGVDPGLLSSEMLQDR LHMDAAVALDTFMEVGF SLL  
MTPSSYWKLMRWN IGP ERK LKVARTV LREFAAEMMERRKMNTCFVGNED EQEDGDI LSCFLNDPDYADDDLLRAMI  
IGYMF AARDTVGTTLTWIF YKLAQNP NIVSNIRKELSPIASRKEAVGVDAMLI FEPKETRSLVYLKAVLYETLR LYP  
AAPLECKTVVADDIMPSGHEVHAGDTIIISIHSMGRMEGVWGEDCLHYK PDRWLLVGGNNMRYVPSHKFLAFNSGPR  
MCLGKDIAIMQKT V IASTLWNFDVEVMDGQTIQPKQACIQQMKNGLIVK LKKREM\*

**>PKS-2.2 (partial)**

ATGACAGGCAGCTCACC GAAAGTTAGTGAGATCCGGGGCGCGCAGCGTGCGGAAGGCTGCGCAGCCATGTTGGCTAT  
TGGAACAGCAAATCCTGCGAACCAGGTGTCCCAAGAAGAGTACCCTTACTACTATTTCCGTGTCAAAAG

**>PKS-2.2 (partial)\_protein**

MTGSSPKVSEIRGAQRAEGCAAMLAIGTANPANQV SQE EYP YYYFRVTK

**>P450-2.2**

ATGGAGCTTAACGTAGTGCAAGCCATGGCAGCTGTCTCATGGTGCTAGTAACCACGAGAGCGCTATGGTATCTGCT  
TTGGAGGCCGTATGCCGTGGCCAGGTGGTTCGATGGCAGGGCATCAGAGGTCGCCTTACAATCTCCTGGTTGGGT  
CCCTGCCGGAGTGCCAGAAGATGATTGTCGCCGGGAGAGCCAAGGATCTGGACACCATCTCCACGACTGCATCACT  
ACCGTTCAACCCTTCTTCCAGAAATGGGCCTCCATGTATGGGAAAACATTCCTATACTGGCTGGGGCCGACACCAGC  
ACTGTGCTCTACGGACATGGAGCTGGTGAAGAAAGTGTAAACCGACAGGACGGACATGTTCCAAAAGACTACTCAA

ATCCTAGCCTGGAAGCGGTTCTGGGGAATGGGGTTGTATTTGCAAACGGACACGACTGGAAGCGGGCGCAAATTC  
 ATCCACCCGGCTTTCAACCAAGAGAAGATCAAGTCCATGTGACGCAATAACGTTGGAGTGCACACAGCAGACAATGGA  
 ACGGTGGCGCAACAGGCAGCAAGCCGAGATAGACATGATGCACGACTCCGACGAGATAGCCATGAGTGTGATTGCGA  
 GAGTGTGTTGGGCAAGTGTCTACAAGGAGGCCTGGGAGGTGTTTCATCGCCGAAAGGAGCAGCTGAAGCTAGCTACT  
 TATGCGTTTTGCGGATCCTCCGGTACCTGGATTATGGTACCTGCCAACACGTGCAACCGTCCGGGCATGGTATCTTGA  
 CAAGCTTGTGAAACATAAGATCTCACAGATCATAGAGGCGCGACTCGCTAGCGGCGTCTACGAAGATGACCTGCTCG  
 GGCAGATGCTGCAGCTGCAGCTGCAAACATGTAGCAGCGGCAGCACCAGACCCCTGAGCACCAGGAGATGGTTGGC  
 GAGTGCAGGACTTTCTTCGCGGCTGGGTACGAAACCAGTGCCAGCCTCATTACCTGGGCGATGTTTCTGCTCGCCAG  
 CTACCCACGGTGGCAGGAGATGGTCAGGGAGGAGGTCGTCGCGGAATATCCTGCTCACCAGTTACCCATAGGTGACG  
 CCCTCGGCAAGTTGAAGCTGGTATGCTACGCACGTACATACTCCACCTTCTAAATTATATATGGTGCATA**TAA**

### >P450-2.2\_protein

MELNVVQAMAÄVLMVLVTTRALWYLLWRPYAVARWFRWQGIRGPPYNLLVGSLEPCQKMIIVAGRAKDLDTISHDCIT  
 TVQPFQKQWASMYGKTFLYWLGPTPALCSTDMELVKVLDRDMDMFQKDYSNPSLEAVLGNVVFANGHDWKRKRF  
 IHPAFNQEIKSMSAITLECTQQTMERWRNRQOAEIDMMHDSDEIAMSVIARVMLGKCYKEAWEVFIAGKEQLKLAT  
 YAFADPPVPGLWYLPTRNRRAWYLDKLVKHKISQIEEARLASGVYEDDLLGQMLQLQLQTCSSGSTETLSTEEMVG  
 ECRTFFAAGYETSASLITWAMFLLASYPRWQEMVREEVVREYPAHRLPIGDALGKLLKLVCIYARTYSHLLNYIWC1\*

### >P450-3.2 (pseudogene)

**ATG**TCAATTCTGTTCTCCCAAGAGCTGCCCATCTACACAGCACTCGTGCTACTTGTTCCTGTACTGCCTGTACTC  
 AAGGGTTATATGTAGATCAGGGAACCCAGCACTCGTGCTCCCCACAACTGGCCAATATTGCACATGTTTCCTTCTC  
 TCTTGGCCAACCTCCACAACCTGCACGAGTATTTAACCTTGTCTTGGCGGATCAGGGCACAACCTCAGGGCGCAT  
 GGCCACCCGGGACCGGGTTGCGGTTCTTTGTACATGCGACCCTACAAATGTCCGACACATTTTACGACCAACTA  
 CACCAACTTCCCAAAGGGCGCGGAGTTTGGCGATATCTTTGACATCGTGGGTGGCAGCCTCTTTACCATCGACGGTG  
 AGCCGTCTCATCAACAGCGCGCAAAAGTCAAGGGCGCGCTCAGCAACCCGCGGATGGCTGCCACTATGGCGGCCTGC  
 TGCTGTGACAAGGTGGAGAACGGCCTCCTCCCGTTTTTAGGCGAATGGCGAGCACTGGCACTCCATTTGACGTGCAA  
 GAACT**GATGTCAAGTTTTATGTTTGACCTGGCTGCTATGCCTTTCTTTGGCGTGGATCCTGGCCTCCTGTCTCGGA**  
**AATGCTACAAGACAGGCTGCACATGGATGCTGCGGTTGCCCTTGACACGTTTATGGAGGTGGGATTTTCCCTGCTCA**  
**TGACACCAAGTTCTTATTGGAAGTTGATGAGGTGGCTAAACATTGGCCCTGAGAGAAAGCTCAAAGTGGCGCGCACG**  
**GTGCTACGGGAGTTCGCCGCGGAGATGATGGAGAGGAAGATGAATACGTGTTTTGTTGGTAATGAAGATGAACAAGA**  
**GGATGGGGATATCTTGTCTTGTCTTCTCAATGACCCAGACTACGCCGATGATGACTTGCTCCGTGCGATGATCATTG**  
**GCTACATGTTGCTGCTAGGGATACAGTTGGAACAACCCTGACATGGATCTTCTACAAACTCGCCAGAACCCCTAAC**  
**ATTGTTTTGAATATCCGAAAAGAACTCTCACCCATTGCATCACGCAAAGCAGCGGTTGGTGTGGGTGCCATGTTGAT**  
**CTTTGAGCCAAAAGAGACCAGATCTCTAGTATATTTGAAAGCCGTCATGTACGAGACTCTCAGGCTATACCCAGCAG**  
**CGCCTCTTGAGTGCAAGACAGTAGTCGCCGATCATATCATGCCAAGTGGACATGAGGTTTATGCCGGCGACACCATT**  
**ATTATTTCTATACACTCCATGGGGAGAATGGAGGGTGTGTGGGGTGAAGATTGCCTCCATTATAAACAGATAGGTG**  
**GCTCTCGGTGGGTGGCAATAACATGAGGTATGTACCATCTCACAAATCTTGGCCTTCAACTCAGGCCCCGAGGATGT**  
**GCCTCGGCAAGGACATCGCAATTATGCAGATGAAGACAGTCATCGCATCAACGCTATGGAACCTCGATGTGGAGGTG**  
**ATGGACGGGCAAAACATCCAGCCCAAGCAAGCTTGTATACAGCAGATGAAAAATGGGCTCATAGTTAAGCTAAAGAA**  
**GCGGGAATGTAA**

### >P450-3.2 (pseudogene) \_protein

MSILFSQELPIYALVLLVPLYCLYSRVICRSGNPALVLPNWPILHMFPSFLANLHNLHEYLTLLVLAGSGHNFRAH  
 GPPGTGLRFFVTCDPTNVRHIFTTNYTNFPKGAEFADIFDIVGGSFLTIDGEPHQQRKAKVKGALS NPRMAATMAAC  
 CCDKVENGLLPFLGEWRALALHLTKN\*

### >PKS-3

**ATG**GGAAGCACCACCCTACCATCGGTGGGTGAGATCCGGCGTTTTGACGCGCGCGGAGGGGCTGCAGCCATCCTCGC  
 CGTCCGCGACGGCAAACCCGCCCAACTGCGTTTTCCAGGAGGAGTACCCCGACTACTACTTCCGCATCACCAGAGCC  
 AACACCTCACAGACCTCAAACAAAACTCAAGTCTTCTGCCAGATGACCTCAACGGAGAAGCGCTACTTCCACCAC  
 ACGGAAGAGCTTCTGGAAGACCACCCCAATTTCTTCTGCCGCGGCATACCGTCCCTAGACGCCCGGCTGGAAATCGC  
 TGCTGCTGCTGCCCCGAGCTGGCGGCGTACGAGCAGCCAAGGCCATAGCGAAGTGGGGCCGTGAGGCCACCGACA  
 TCACCCACCTCGTCTGCGCACCAACTCTGGTGCAGCAAGCCCCGGCCGTGACCTCCGCCTGGCCTCTCTGCTCGGC  
 CTGCGCGCGTCCGTCTGCAGGACGATGCTCAACCTCAACGGCTGCTCCGCCGGTGGCGCCTCGCTCCGTCTCGCCAA  
 GGACCTGGCCGAGAACAACCGCGGCGCGCGTGTGGTGGCCTGCGTGCAGCTCACCGTCTGCTCGCCTTCCACGGGC  
 CCGAGGAGGCGTACCCACACAAGCTCATCAGCCAGGCTGTCTTTGGCGACGGTGGGGCGCGGTCATTGTGCGAGCT

GACGCCGTGCACCCCATCGAGCGCCCGCTCTTCGAGATGGTGTGGCCTCACAGACCACGATAACCAGCAACCGACGG  
 CGTGCTCACCATGCAGCTCACGGAAGCCGGCCTCGACGGCCACATCTTCACCAAGGAGCTAATTCCTCTAGCAGCGC  
 AGCACATCGAGCAGTGTCTCATGGACGCGTTCCAGCAGCTTGAATAATGAACGGGGGCACGAACTGGAACGATCTC  
 TTCTTTGTGGTGCACCCTGGCACCCATGGAATAATGGACCACATCCAACGGGCTCTCCGGCTAGATCCTGGGAAGCT  
 GGCCGCTAGCCGGACTGTGCTGAGTGAGTACGGGAACATGCTTGGTGCCACACTGATCTTCGTGCTCGACGAGCAAC  
 GGCGGCAGATGGAGGAGGACGGAGAGACGGGTGAGTGGGGTGTGATGATGGGATTTGGACCAGGGTTACAGTTGAG  
 ACCATGCTGCTACATGCGGTGGCCAGAACTGCACAACAAAAAT**TGA**

### >PKS-3\_protein

MGSTTLPSVGEIRRLQRAEGPAAIILAVGTANPPNCVSVQEEYPDYYFRITKSQHLTDLKQKLKSFQMTSTEKRYFHH  
 TEELLEDHPNFFCRGIPSLDARLEIAAAAAPELAASAAAKAIKWGRQATDITHLVVGTNSGAQAPAVDLRLASLLG  
 LRSVCRTMLNNGCSAGAASLRLAKDLAENNRGARVLVACVELTVVAFHGPPEEAYPHKLI SQAVFGDGAGAVIVGA  
 DAVHPIERPLFEMVSASQTTIPATDGLVLTMLQTEAGLDGHI FTKELIPLAAQHIEQCLMDAFQQLGIMNGGTNWNLD  
 FVVVHPGTHGIMDHIQRALRLDPGKLAASRTVLSEYGNMLGATLIFVLDEQRRQMEEDGETGEWGVMMGFPGPFTVE  
 TMLLHAVARNLHNKN\*

### >Hyd-2

**ATG**CAGGAAAGCAAGAGTTCTCCGGTACTTAGCAAGAAGGATGACGGCGAGGAGGGCATCACCGTCGACCTGTATCC  
 ATTCATACGGGAATACAAGGTCGGCCGTGTGGAGCGCTTACTGCACAGCCCATTTCGTGGCAGCGTCCAAGGACCCGG  
 CAGCAAACCGTGGAGTTGCGACCAGGGACGTGGTCGTCGACGAGAGCACCAGCGTGTTCGACGCGCTGTTCCCTTCCC  
 TCCATTGCAGCCCGCTACGGGGATCGGGCGGAGAGGCTTCCCCTCCTCATGTACGTCCACGGCGGATCCTTCTG  
 CACGGGGAGCGCGTTCTCTCGCACTTACCACAGCTACACCAGGTCTCTGGCGGCCAGCGCCGGCGCTCGTCTGT  
 CCGTGGAGTACCGTCTCGCGCCGGAGCATCCTGTGCCTGCAGCCTATGAAGATGCATGGGCGGCGCTCCAGTGGGTG  
 GTGTCCCTCTCTGATCCGTGGCTGTGAGACTACGCAGACCTCGGGCGCACGTTCCCTCGTTGGCGACAGTGCCGGCGG  
 GAATATTGTCTACAACACGGCGGTGCGTGCAGGAGTGGCGGTGGCAGCCACATCCACATCGAAGGGCTGGTCATCG  
 TGCACCCATACTTCTGGGGGGTTCGAGCGGCTGTCCAGCTCCGAGGCAGTCTGGGACGGCATCGCCATGTTTGCTCCC  
 GAGGACGTCGACAGGCTCTGGCCGTTTATTACGGCCGGCCGGCTGGGAAACGACGATCCCTTGGTCAACCCCGTTCGA  
 CGAGGAGATCGCCTCGCTGACATGCCGGCGTGTGCTGGTGGCCGTGGCCGAGAAGGACACCTTGCCTGACCGCGGGC  
 GTCGGCTGGCAGCTCGCATGCGCGACTGCTGCTCATGGCCGATGATGAAAACGCGGTGACATTGATAGAATCAAAG  
 GGAGAAGACCATGGCTTCCACCTGTACAACCCACTGCGTGCAGCAGCAAGATCCTCATGGAGAGCATCGTACGGTT  
 CATCAACCAGCGCACACCCTTCCCGCTGCCAAAACCTTACGAGCTGCATGCATGCCAAGGTAAGAGGAAGGCATCGT  
 CTCCGGGTGACATGGACACAGCCGTCCAGCATGTTCTAGGCGTGCCAACCAGGCCGTATATAGACGTACATGGCTAT  
 GGGACGTCATGAGAGTCACAGATGTGACACGTAGTAGTTGCTTACGCATTGGAAATGGAAGAAAAGCATCCAAAAC  
 AAGTTCTCGTCATCAGGCCAAACATACCAACATGAGGTTCTCGTCATCAGCAACAACAGCTCC**TGA**

### >Hyd-2\_protein

MQESKSSPVLSKKDDGEEGITVDLYPFIREYKVGRRVERLLHSPFVAASKDPAANRQVATRDVVVDESTGVFARLFLP  
 SIAAAATGIGGERLPVLMYVHGGSFCTGSAFSRTYHSYTRSLAASAGALVVSVEYRLAPEHPVPAAYEDAWAALQWV  
 VLSLSDPWLSDYADLGRFTLVGDSAGGNIVYNTAVRAASGGSHIHIEGLVIVHPYFWGVERLSSSEAVWDGIAMFAP  
 EDVDRLWPFITAGRLGNDPLVNPVDEEIASLTCRRVLVAVAEKDTLRDRGRRLAARMRDCCSWADDENAVTLIESK  
 GEDHGFHLYNPLRATSKILMESIVRFINQRTPLPLPKLHELHACQKQKASSPGDMDTAVQHVLGVPTRPYIDVHGY  
 GTSMRVTDVTRSSCLRIGNGRKASKTSSRHQAKHHQHEVLVINSNSS\*

### >Wax ester synthase (WES)

**ATG**GACCCTGGCAGTGGTAGTCCTTGGGCATCAGCTCAAAGAAACCGACTGCTCCCGATCCGCTTGTCAGAGAACC  
 TGCCAACACTGAGTGGACGCCCGCCCGGTTCTCCGGCGGAGGAGCCGGTGAGCCCTACAGCAAGAGCCATGGAAG  
 ATATAGGTATTTATATCGTCGTACGGTCGGCCTCGACACGCCGATAAACCTGACCACCTTCCGAGCCGGCATCGAA  
 GCTATGCTTGGCCGATGCCCGCGCTATGGATGCATTTCATGTGGCGGATGGGCTAAACAATGGCGAGGCGCGATGGGC  
 GCGCACTACTGTGAACGTCCAAGATCACATGATCGTCCGAGGCTGGACCGCGGACCGACCCAGACAAGCCGCTGG  
 AGGACTACGTGCGCTCGTCCACGCTCCCATGTTCCGCTCCCGCCCGCCATGGGAGTTCACACTTCCCTCGACTTC  
 CCGACCTCCGAGGCGGCTCCACGGTGGCGATCCGCGTGCACCACGCCTACGGCGATGGTATGTCCACCATTGGCGCT  
 TCTCATGATGTCCACGCGCAGCGCCATCACCGACACAAAAGTCATCCAGCCGCGCCTCCGCATCGTCGTCCTACGC  
 GCACGAGCGCCATATATGCCCTCAACGCCCCCACTTTCCGCGGGCGCCCTGGCGTTCGTGCGATGGGTCTGGTCCG  
 TATCTTGTGCTGGCGTGGAAACCCGCGGACAGACATTGCCTACTTCGCGCCACGATTATGTTCTTGAGTGACCCGCG  
 CACTCTCTTCAAGCATGCCGACGACGGGTTCCACGCCAAGCGCTTTGTCCACCGGAGTCTTAGCCTCGATGACGTCA  
 AGTTCCTCAAGAACTCCATGAACTGTACTGTCAATGATGTGTTGGTTGCACTGACTTCTGCTGCTCTATCAGATAT

TACTTCCGCAAGTCCGAATCTGATAAGAGGAACGAGGTGACATGGGGAAATAAATTGGGCTACATCATTCTTCCATT  
 TTATCTAGCCAGACACGATGATCCACTTGCATACATTACAAAAGCAAAGAAGTTCTGGATAGGAAAAAGAGGTCTCT  
 TAGAAGTGATATTCACATATAAGATTGCTGAGATCTTCATGAATGTTTTTGGTGCCAAGTCATCATTGAACCAGGTA  
 GGAACCTTCTATCTTCCGGTGTCTCTTTGCACGTACAACAATTGTTTTCTCAAACATGGTTGGACCAACCGAACAAGT  
 AGAATTATGTGGACACCCAGTGGCTTTTCATTGCACCTAGTGTCTATGGGATTCCAGAGACTGTGAACTCTACTATGA  
 TGACCCTTCTTCAGTGA

**>Wax ester synthase (WES) \_protein**

MDPGSGSPWASAQRNRLLPIRLSREPANTEWTPPAGSPAEEPVSPTARAMEDIGIYIVVTVGLDTPINLT  
 TFRAGIEAMLARCPRYGCIHVADGLNNGEARWARTTVNVQDHMIVPRLDRATDPDKAVEDYVASLSTLPM  
 VRSRPPWEFHFLLDFPTSEAASTVAIRVHHAYGDGMSTMALLMMSTRSAITDTSKSHPAAPPHRPRTSAI  
 YAPQRPLSAGALAFVAWVWSYLVLAWNATAADIAFYAATIMFLSDPRTLFKHADDGFHAKRFVHRSLSLD  
 DVKFLKNSMNCVTNDVLVALTSAALSRYFRKSESDKRNEVTWGNKLYIILPFYLARHDDPLAYIHKAK  
 KVLDRKKRSLEVIIFTYKIAEIFMNVFGAKSSLNQVGTISIFRCLFARTTIVFSNMVGPTEQVELCGHPVAF  
 IAPSVYGIPIETVNSTMMTLLQ\*

**>Ank\_PGG**

ATGCAGATGGACAGACGGCTCCTGAAAGCAGCCACATCGGGTGACTCGGCGTCGATGCAGGCCATGGCTTCGCAGGA  
 TCTAAGCATTCTTCTCGGAACAACCCCGCAGGGGAACACTTGTCTCCACATATCCTCCATCCATGGCCACGAGGGGT  
 TCTGCGTGGACGTGATCGCACTAGAGGAGTCCCTGCTCGCCCAGACCAACCTGGACGGCGAGACGCCGCTTGTGCC  
 GCCGTGAGAAGCGGCTCCGTGGCCGTGGCTTCCGCCTTGTCTCGGACGCTACCGAGTGCGGCGGTTGAGCGAGGCCAT  
 CTTGGAGAAAGACAAGGACGGATGCAGTGCCTCCACCATGCCATCTGCAGCGGCGACACGGAGCTCGCTCTGGAGC  
 TGATAGAAGCAGAGCCCGCCCTCTCCAAAGGTGTCAACAACCTCGGCGACCCGCCAATGTACGTTGCTGCCGCCAGA  
 GATCTTACTAGCGTTGCCCTGAGACTGTTGGAGATTGGCGATTCTGATCACGGGGGACAGTTCGGCTACAATGCTCT  
 CCATTACAGCAGTCAGAAATGGGAACTCAGTTATCGTTAAAAGAATCATGGCCAAACGTCCTGGGCTGGCCAAAGAAG  
 CTCACAAGCGTGGGTATACTCCAATGTGCACGGCCATGTACCGTGACAAGATCGACATGCTACGGCTGCTGCTGGAG  
 CATGATCCCGCTCTAGGGTATGACATGACGAGCGATGGTTATTCTCTCCTTCAGGTTGCTGCACACGCAGGTCATGT  
 TGCCACTGCACGCGAGCTGCTTAAGCACTGCCAGATGCTCCTTGCCGCGGAGCACGCGTTGAGCGTTGGACGTGCC  
 TCCACACATCCGTATACTATGGTCATCTGGACTTTGTGAAATTTGTCTCGCAACGCCACAGCTTGGCAAACCTGGTC  
 AACATGCAGGACAACAAAGGAAGAAGTGTCTGTCATCTCGCTGTGGAGAAGTGTGATCCAAAAGTGGTTGCTGCTTT  
 ACTGTCTCATAAGGATACACACACACATGTGATGAACAACAACGGCACGTACCAGCTTGGGTATTGTGAGGAATCA  
 TGCATCGTGCCACGACGTTAAACTGGAATGAAGTGTGATGCTTATGCTGAGAGCTGATCCCCAAAGTGCCCCCTTCA  
 GCTTATAATCTTCATGTGCACACAACACGGCTGTTGACCGATGCATCACGGATGGATGCAAAGTCACTAACTAAAAC  
 ATACACAACCAACCTCATTAGTGGCGATCCTCATTACAACAACACCTTTGCCGCTGCTTTACCCTCCCCGGAG  
 GATACAGCAGTGCTACTGGAAGCGAGGGACTTCCCATCATGTCTCAAAGGCTGCATTCAAGGCATTACATAATCTCT  
 GACACCTTAGCAATGTGCTCTTCAATTTGTTGTGCGCTTTATATGCATCGTAGCAAGGTGGAAGGATTATGAGTTCTT  
 GATCTATTACAGATCCTTCACTAGGAAGCTCATGTGGTTTTGCATACGTGGCAACAACACTACGGCCTTTTCAACTGGTT  
 TATACACAGTGTGGCTCAACGTCTCCACTGGCTATCCATATCAATTTGTGTTTTGGTAGCTTTGTTGCCATTCTT  
 ACTAAGTTGCTGGGCGAATGGCCTTACTTGAAGATCAGATTCCGGCTTAGGTAGAAGTTTACAGCTCCGATCTCCTTGA  
 CATGGTGTGA

**>Ank\_PGG\_protein**

MQMDRRLKKAATSGDSASMQAMASQDLSILLGTTPOGNTCLHISSIHGHEGFCVDVIALEESLLAQTNLDGETPLVA  
 AVRSGSVAVASALLGRYRVRRLSEAILEKDKDGCSALHHAICSGDTELALIEAEPALEKGVNNGDPPMYVAAAR  
 DLTVALRLLLEIGDSDHGGQFGYNALHSAVRNGNSVIVKRIMAKRPLAKEAHKRGYTPMCTAMYRDKIDMLRLLLE  
 HDPALGYDMTSDGYSLLQVAAHAGHVATARELLKHCPCDAPCRGARVERWTCLHTSVYYGHLDFVKFVLATPQLGKLV  
 NMQDNKGRALHLAVENCDPKVVAALLSHKDTHTVMNNGTSPAUVLSGIMHRATTLNWNEVMMLMLRADPQSAPS  
 AYNLHVHTTRLLTDASRMDAKSLTKTYTTNTSLVAILITTTITFAAAFTLPGGYSSATGSEGLPIMSQAFAFKAFIIS  
 DTLAMCSSFVVAFICIVARWKDYEFLLIYRSFTRKLMWFAYVATTTAFSTGLYTVLAQRLHWSISICVLVALLPIL  
 TKLLGEWPYLKIRFGLGRFTSSDLLDMV\*
